# Supplementary material for: Liuwei Dihuang formula ameliorates chronic stress-induced emotional and cognitive impairments in mice by elevating hippocampal O-GlcNAc modification
Source: Frontiers journal article supplement (doi:10.3389/fnins.2023.1134176), 2023-04-20
Supplement: Table_12.XLS [file Table_12.XLS]

## Sheet: Supplementary Table 12_Predicte
Module	Description	LWM4	LWM9	LWM7	LWM1	LWM3	LWM6	LWM5	LWM10	LWM8	LWM2	MOD7	MOD9	MOD2	MOD4	MOD6	MOD10	MOD5	MOD1	MOD3	MOD8	CON2	CON10	CON5	CON6	CON4	CON8	CON9	CON3	CON1	CON7	High/Low Ratio	Log2 [LWD/CUMS Ratio]	High/Low Ratio	Log2 [CON/CUMS Ratio]
M00001	Glycolysis (Embden-Meyerhof pathway), glucose => pyruvate	320685	338572	289459	394569	442097	503557	253901	579783	419639	411261	244736	424585	253989	377500	507913	217545	401581	429659	203245	302520	395324	365510	356520	331814	354561	287245	450050	323696	519672	359290	1.1755	0.233274	1.11311	0.155
M00003	Gluconeogenesis, oxaloacetate => fructose-6P	241361	246582	210881	305871	322571	385561	189048	442308	326475	331979	175482	314716	191319	289463	387881	159736	309374	318822	154325	223788	306299	271009	275900	268066	276673	210056	346711	245168	380658	277892	1.18921	0.25	1.1321	0.179
M00002	Glycolysis, core module involving three-carbon compounds	193042	192225	192340	274049	237377	323335	172997	364945	274990	293214	152106	247989	171079	266121	320842	137563	266023	260158	138953	180547	256281	220389	230236	235399	250823	174268	303487	211403	294006	225773	1.17612	0.234031	1.12174	0.166
M00173	Reductive citrate cycle (Arnon-Buchanan cycle)	330418	304559	163094	206827	225959	247262	147075	288035	271278	281101	193311	287884	180150	192016	256163	187874	227174	296605	148599	218802	187492	305264	250334	203177	183122	172521	228996	205664	268293	303353	1.12658	0.17195	1.05467	0.077
M00048	Inosine monophosphate biosynthesis, PRPP + glutamine => IMP	257991	251717	158243	158838	207368	203381	143536	332957	245841	326359	185536	272149	162964	185219	228033	164554	197825	276154	138565	212757	141303	266887	186195	228921	135769	175273	301683	178000	328104	273098	1.1297	0.175936	1.09462	0.13
M00051	Uridine monophosphate biosynthesis, glutamine (+ PRPP) => UMP	210167	210280	159079	223151	229176	274273	146677	300819	235185	227629	149211	252830	156689	218853	288958	135033	234229	256682	133858	189758	210825	209071	211897	183451	197004	166516	241650	184003	294214	207706	1.09937	0.136674	1.04476	0.063
M00009	Citrate cycle (TCA cycle, Krebs cycle)	306543	281246	147587	179087	212751	212200	133756	263282	238838	247897	177620	258513	166073	174029	224230	172890	205801	282808	139921	195589	165302	289396	210693	174598	162405	153433	201504	181591	229453	277735	1.113	0.154453	1.02435	0.035
M00157	F-type ATPase, prokaryotes and chloroplasts	188184	182151	157179	205590	193170	246015	141227	272907	220519	234972	141691	215729	146034	203272	248162	128278	214592	227471	120668	162854	181385	196041	188947	168542	183161	150433	222078	172305	240154	191193	1.12891	0.174931	1.04726	0.067
M00004	Pentose phosphate pathway (Pentose phosphate cycle)	164955	165240	155728	187465	250828	240932	139911	273671	197908	191850	144556	209717	137709	187869	239803	124959	194552	209351	113296	157953	185982	184097	174898	165777	161767	150883	227587	165564	246849	171271	1.14463	0.194875	1.06682	0.093
M00016	Lysine biosynthesis, succinyl-DAP pathway, aspartate => lysine	193204	184177	143945	154231	250952	204313	133950	289402	188630	225807	151400	231427	133685	170009	207008	130797	177837	221821	110919	168673	138323	214780	167309	162217	118151	159861	236887	153529	284288	196400	1.15557	0.208611	1.07523	0.105
M00011	Citrate cycle, second carbon oxidation, 2-oxoglutarate => oxaloacetate	279561	234674	113163	158671	164138	185555	107522	215579	212616	214077	148894	207610	146658	150506	178388	152221	176084	238526	118996	159158	141152	252375	196799	165263	146672	125698	162240	161208	165655	257806	1.12434	0.169073	1.05833	0.082
M00527	Lysine biosynthesis, DAP aminotransferase pathway, aspartate => lysine	193593	187116	120049	134035	215178	181638	110658	249693	176526	191801	136655	218838	120616	145606	190194	120548	158228	214661	98962.3	162934	116411	188754	155066	152166	99335.5	142083	205809	138752	262855	188912	1.12318	0.167584	1.0529	0.074
M00026	Histidine biosynthesis, PRPP => histidine	201898	204843	161361	129150	185867	150609	132998	180994	165267	186747	176435	227740	134799	136322	199881	153028	155617	215650	115173	189551	109759	204411	131421	102788	108447	143900	162653	154327	250880	175469	0.997381	-0.00378309	0.906031	-0.142
M00525	Lysine biosynthesis, acetyl-DAP pathway, aspartate => lysine	161182	155302	117245	147605	202346	184866	115488	262535	170527	215258	120644	201356	115895	163337	184007	105152	156794	190712	93201.9	140768	113355	178104	152773	175773	107257	136161	237177	132814	242796	173025	1.17698	0.235086	1.12051	0.164
M00165	Reductive pentose phosphate cycle (Calvin cycle)	140558	147662	143659	148503	235632	201294	117488	241870	164622	166743	126500	198265	107368	140608	222094	107860	160302	185752	84125	145080	158556	166958	141939	132971	124895	135153	200900	139944	251781	142047	1.15567	0.208733	1.07929	0.11
M00017	Methionine biosynthesis, apartate => homoserine => methionine	165673	155093	103029	113070	165779	148952	98310.5	213394	155034	186776	121818	182929	110256	130410	160595	104991	140318	186431	99077	144367	104867	175770	126417	158475	92777.5	118426	210355	117053	219362	166893	1.08972	0.123956	1.07907	0.11
M00096	C5 isoprenoid biosynthesis, non-mevalonate pathway	169320	163348	113871	118943	153426	153311	96014.4	183873	147951	130057	123385	183224	107659	121538	175250	109952	140596	191239	92204.7	148352	110067	167733	134646	96266.4	100700	120629	145270	121854	224714	154840	1.02635	0.0375218	0.988028	-0.017
M00526	Lysine biosynthesis, DAP dehydrogenase pathway, aspartate => lysine	166774	158194	95363.7	112707	177975	152326	90771.3	208198	149527	160527	113153	182622	102164	122583	156031	100727	133759	183379	84366	135648	97342.1	163601	131503	130587	83972.3	117116	173152	115622	213598	163515	1.12015	0.163692	1.0575	0.081
M00022	Shikimate pathway, phosphoenolpyruvate + erythrose-4P => chorismate	151912	154908	109215	99224.4	157511	137264	89367.3	166282	131718	120867	117929	178969	95535	100426	163710	102841	128650	172546	84856.5	143461	101198	166105	118667	73241.8	85630.5	117275	130677	110426	228956	137577	1.02277	0.0324781	0.985128	-0.022
M00053	Pyrimidine deoxyribonuleotide biosynthesis, CDP/CTP => dCDP/dCTP,dTDP/dTTP	111693	111533	99483.9	136301	124519	149824	95536.3	192638	136884	172929	85657.4	135624	95305	142896	154022	77053.4	134493	138250	81421.5	98815	111057	133146	114795	110246	117428	90544.7	154502	105962	146230	121701	1.16423	0.219376	1.05428	0.076
M00570	Isoleucine biosynthesis, threonine => 2-oxobutanoate => isoleucine	130077	132840	93637.8	84384.3	149600	122179	76352.2	159184	119059	123300	101527	163998	80227.6	87005.8	152422	87820.9	114821	161124	72003.9	129180	95006.8	135082	100848	69776.6	71569.1	103985	110541	95710.7	207267	124715	1.0352	0.049908	0.969021	-0.045
M00126	Tetrahydrofolate biosynthesis, GTP => THF	157721	143625	73369.7	105680	92622.1	117289	72523.1	139139	128055	127636	95514.9	140181	99417.3	111375	137111	92534.7	117984	161167	85157.5	118315	80512.2	143968	115754	94466.4	94852.4	88944.2	108277	104917	136820	151639	0.999054	-0.00136497	0.966684	-0.049
M00909	UDP-N-acetyl-D-glucosamine biosynthesis, prokaryotes, glucose => UDP-GlcNAc	101119	99394.6	93261.7	124545	133946	149829	83049.6	175071	125773	132491	78950.6	128653	81286.9	120551	147460	70608.5	121146	126828	65428.6	90051.1	116379	120348	112185	97932	106084	88963.8	139950	99473	147932	111453	1.18189	0.241091	1.10644	0.146
M00050	Guanine ribonucleotide biosynthesis IMP => GDP,GTP	105715	104963	91941.1	121571	109862	141161	83360.3	169509	127635	139456	80023.5	122460	84724.6	122585	140774	71849.3	120927	130197	70233.4	90328.6	107196	116576	107882	96298.9	109545	84649.8	134039	97543	139014	112811	1.15576	0.20884	1.0691	0.096
M00167	Reductive pentose phosphate cycle, glyceraldehyde-3P => ribulose-5P	90751.5	100536	103680	95761.6	186589	139713	81725.8	170798	109448	102730	90636.5	140936	70680.2	89558.9	158185	75083.1	107427	126954	53780.1	102916	112197	112469	93299	90190.6	78913.4	96972	143417	96830.1	187066	90955.8	1.16294	0.21778	1.08478	0.117
M00023	Tryptophan biosynthesis, chorismate => tryptophan	153354	151699	59874.4	76636.1	135570	118508	53465.9	143356	117121	99009.6	89841.8	161108	80584.1	79694.1	136650	82521.8	108288	168791	73344.4	127329	85370.9	127129	108508	73252.6	66579.3	97040.5	82053.8	90134.1	183659	138617	1.0004	0.000575829	0.949638	-0.075
M00007	Pentose phosphate pathway, non-oxidative phase, fructose 6P => ribose 5P	91793.6	97432.1	103181	97190.1	170141	134586	84108.3	163337	108016	104346	91757.2	133092	73529.6	94045	143602	75896.7	106349	123174	58439.8	97243.3	106452	113456	94871.4	89976.1	81793	95750.2	142812	94104.7	171480	91572.4	1.15745	0.210956	1.08538	0.118
M00127	Thiamine biosynthesis, prokaryotes, AIR (+ DXP/tyrosine) => TMP/TPP	145093	130609	75235.3	101692	105870	125895	72350.8	128615	117418	108165	94877.9	124939	89896.3	103526	114445	87989	106016	134744	77242.7	99876.9	90930.1	120600	118251	91436	93361.6	92227.2	105431	100751	117383	132209	1.07488	0.104172	1.02808	0.04
M00019	Valine/isoleucine biosynthesis, pyruvate => valine / 2-oxobutanoate => isoleucine	121295	123404	82131.5	77716.2	135068	113146	67761.8	145006	111965	111786	92017.5	148878	73421.2	78961.8	138128	80341.4	104709	146925	64903.2	117358	87372.5	120474	94744.8	66312.1	66047	94067.8	97149.8	88774.3	185668	116885	1.04173	0.0589834	0.97308	-0.039
M00632	Galactose degradation, Leloir pathway, galactose => alpha-D-glucose-1P	101892	107199	84567.6	113946	102952	136737	75849.8	143916	119540	110306	79222.7	116120	80816.3	111180	134251	71310.5	114440	125612	65368.9	89626.9	104570	104244	104716	89700.6	105545	81175.2	119592	97079.1	126570	106399	1.11029	0.150932	1.05227	0.074
M00620	Incomplete reductive citrate cycle, acetyl-CoA => oxoglutarate	175178	156128	60994.3	79791.4	95714.7	99278.5	55207.9	124540	123701	137179	89241.3	141066	79969.4	71994.7	103451	89147.3	91197.9	140037	65114.4	104408	72631.8	142620	111935	81975.9	64541.6	76031.8	78823.3	91110.8	118274	155573	1.13539	0.183182	1.01834	0.026
M00049	Adenine ribonucleotide biosynthesis, IMP => ADP,ATP	104198	102479	86227	107364	99749.1	124679	75625.3	151893	115525	131884	77397.2	116679	77752.5	106844	128802	69979.7	108146	124917	62866.3	86435.9	94336.9	111130	98067.9	85759.8	96344.5	79454	118026	90088	132482	106419	1.14566	0.196173	1.05448	0.077
M00144	NADH:quinone oxidoreductase, prokaryotes	218595	148536	60404.4	83947.2	73772.2	95940.8	52793.2	103551	116265	149826	95959.8	140581	92945.6	72722.8	91923.4	102300	95234.1	198014	68665	94428.2	61162.9	115914	99728.9	81930.6	81201.7	66261.8	64654.2	89320.1	85056.5	151928	1.04831	0.0680623	0.852185	-0.231
M00083	Fatty acid biosynthesis, elongation	119423	121269	65043.6	73398.3	130656	107185	52445.7	176266	113802	145126	69570.6	145777	58408.2	68903.9	127554	64283.3	90482	143132	43848.4	94048.7	82023.3	124626	89049.1	60551.1	59895.5	82953.4	94133.4	77456.5	176275	121357	1.21921	0.285949	1.06878	0.096
M00120	Coenzyme A biosynthesis, pantothenate => CoA	98850.3	94630.4	79088.6	106808	99297.2	126687	69795.7	142827	111697	111009	71079.2	112661	71984.7	102047	126416	65020	105050	118115	56641.1	82766.8	92614	107415	99996.9	85815.9	95640.1	76672.5	115521	87719.7	128439	101680	1.14138	0.190781	1.08745	0.121
M00018	Threonine biosynthesis, aspartate => homoserine => threonine	109636	105109	74722.3	75662.1	99042	91306.8	70095.6	140868	99493.8	139662	83747.9	121894	75187.3	90492	99419.2	73384	91001.2	125135	66148	93898.9	58798.3	121399	82506	104650	56392	79068.7	146313	76643.6	144710	110228	1.09268	0.127865	1.06563	0.092
M00572	Pimeloyl-ACP biosynthesis, BioC-BioH pathway, malonyl-ACP => pimeloyl-ACP	121616	125333	63637.8	70702.4	119716	102625	51220.9	164725	113928	156994	71276.2	137558	59390.8	65068.5	120251	67380.5	86497.8	134466	42581.4	90449	79526.2	117676	88598.9	65326.9	60655.2	79506.6	84307	80210.5	156850	123851	1.2464	0.317765	1.07039	0.098
M00121	Heme biosynthesis, plants and bacteria, glutamate => heme	120594	124950	75864.5	62487.3	116030	87144.8	54803.3	133526	93570.9	127266	76634.3	151451	59274.8	57604.2	130900	71633.9	91308.5	150095	49798.5	103413	66040.9	130900	78535.7	49098.6	50787.1	81143.4	82702.1	71611.7	177470	101375	1.05745	0.080586	0.944327	-0.083
M00374	Dicarboxylate-hydroxybutyrate cycle	123040	112432	64814.3	86752.3	112889	101661	60387.4	124456	99679.6	110817	73424.9	122670	73083.1	83171.2	113954	69189.4	97250.4	127536	65690.2	90812	80661.8	119566	93929.4	76283.4	74596.9	68099.4	93314	77875.6	115455	105595	1.08742	0.120912	0.987561	-0.018
M00376	3-Hydroxypropionate bi-cycle	140087	119982	58827	76256.5	86105.8	92951.8	52459.3	133806	108891	128214	76120.3	121470	72975.2	76261.5	89475.4	76755	88996.3	148487	57540.6	82510.8	67978.9	137470	91602.1	71914.8	68745.4	70704.7	86073.6	78260.9	107759	136921	1.12013	0.163669	1.03014	0.043
M00793	dTDP-L-rhamnose biosynthesis	99541.2	92343.7	76182.2	98468.2	106378	120708	66486.7	125076	97974.1	78126.7	73446.5	107870	71880.2	91698.4	122485	67380.8	100671	119698	56016.7	80415	92608.9	86484.4	95287.2	45009.8	89553.1	77034.6	70601.5	84707.8	118266	85970.1	1.0782	0.108628	0.948362	-0.076
M00346	Formaldehyde assimilation, serine pathway	103104	91384.2	60148.1	91315.9	93117.1	112618	54112	115377	99844.8	84518.2	61975.5	100820	65439.9	82766.5	111375	60592.3	93635.2	109278	51499.1	73118.4	89928.5	89660.2	88764.3	76410.4	84243.7	63135.7	85290.6	80034.8	97604.6	95803.3	1.11726	0.159965	1.04982	0.07
M00892	UDP-N-acetyl-D-glucosamine biosynthesis, eukaryotes, glucose => UDP-GlcNAc	89542	85145.9	63644.9	87298.6	106451	110982	55891.4	127641	95611.3	87654.7	61397	103107	60838.6	82153.2	112046	56511.1	88804.4	107134	46579.9	73440.4	84152.1	92546.5	86140.3	71196.9	74581.2	68197.6	94727.9	76094.1	116610	93291.7	1.1488	0.200126	1.08273	0.115
M00308	Semi-phosphorylative Entner-Doudoroff pathway, gluconate => glycerate-3P	89087.6	91635.5	71552	81448.4	108570	107040	59908.3	120211	89887.5	84755.9	69781	97055.9	61008.6	78250.6	109489	61812.7	82751.8	106382	45329.6	79753.5	74751.1	98048	84938.7	63495.2	66659.4	74606.2	87549.1	78198.5	129598	90816.4	1.14209	0.191679	1.07206	0.1
M00115	NAD biosynthesis, aspartate => NAD	110971	97487.1	68351.4	81456.5	79642.6	96951.4	57306.3	111656	92791.6	85428.3	73118.5	101146	67153.2	76842.9	91536.1	68449	82031.5	116818	51760.6	75332.4	68945.1	102025	83296.6	70286.3	72362.9	68018.7	95347.8	76977	99313.6	99329.3	1.09681	0.133316	1.03944	0.056
M00855	Glycogen degradation, glycogen => glucose-6P	78480.4	91970.4	71771.6	69094.2	106872	88133.1	65924.9	107998	82317.5	75597.6	77401.6	99885.7	68639.2	81916	102906	63740.3	85010.5	95319	64651.9	92504.5	65185.9	86576.9	68549.1	78656.8	57370.1	72644	118368	73716.7	140703	85794.3	1.00743	0.0106846	1.01874	0.027
M00866	KDO2-lipid A biosynthesis, Raetz pathway, non-LpxL-LpxM type	168181	126616	46036.2	67469.9	43075.8	70612.3	43968.6	66082.6	93081	101222	79328.2	90398.3	80666.1	64923.1	62480.1	86920.9	75166.5	132645	60341.7	77519.2	41959.5	109268	89653.6	73964.2	68077.5	51004.1	46754.3	80165.5	45825.9	137046	1.01969	0.0281305	0.917731	-0.124
M00874	Fatty acid biosynthesis in mitochondria, fungi	90781.8	91869	53379.7	55718.7	109820	85513.4	39329.5	137912	87405.9	99849.7	54299.2	114414	42956.6	48124.9	103050	49519	69158.8	112238	30438.5	73047.7	69059.6	95229.2	67578.5	47878	46735.4	65746.2	73919.8	60711.6	139338	88405.8	1.22134	0.288471	1.08226	0.114
M00082	Fatty acid biosynthesis, initiation	95157.9	83243.2	44034.7	50470.2	79704.9	71205.2	39223.2	132108	87052.9	135857	53358.8	117056	47809.3	53916.4	82780	50736.1	70534.1	118711	42812.8	73141.5	52950	114578	67298.9	42380	35778.1	64601.2	75451	51618.6	134344	100819	1.15081	0.202645	1.04074	0.058
M00140	C1-unit interconversion, prokaryotes	69408.4	69110.4	60020.3	85629.1	74328.9	101214	52612	107051	86296.3	80241.2	50725.1	85423.9	53932.3	79496.2	101632	47207	82436.1	85042.5	41783.8	60093.6	77827.1	75489.3	75957.3	71839.6	77874.9	56522.4	91314.7	68602.6	94728.1	72972.1	1.14269	0.192435	1.10956	0.15
M00125	Riboflavin biosynthesis, GTP => riboflavin/FMN/FAD	107743	89503.6	47625.7	66305.8	83030.5	88109	42335.8	96541.9	81070.7	90091.1	58750	96504.3	56953.4	60977.7	75604.6	58959.8	72846	105915	42582.4	62995.9	59775.6	93488.6	84099	58105.8	57701.1	62270.1	64491.9	64911.4	93320.9	98978.6	1.14488	0.195193	1.0651	0.091
M00345	Formaldehyde assimilation, ribulose monophosphate pathway	61516.3	81755.7	58859	59365.9	131563	101259	43724.7	126883	77329.4	60352.9	51600.2	104389	39704.7	52492.2	114590	42122.4	72539.8	94545.2	29107.9	71706.7	80938.6	77342.8	64294.5	46178.6	51092.9	66820.1	78826.6	61596.6	148996	66218.2	1.19294	0.254525	1.10331	0.142
M00549	Nucleotide sugar biosynthesis, glucose => UDP-glucose	68817.7	64436.4	52241.3	82530.4	88977	98941.8	51129.3	109247	79478.4	78622.6	48297.6	81838.6	53429.8	80958.8	90320.4	43891.8	79627.4	81309	43738.4	56731.8	73398.8	79748.3	74735.6	72445.7	70356.9	55710.7	97457.5	62736	92242.8	74809.7	1.17311	0.23034	1.14163	0.191
M00845	Arginine biosynthesis, glutamate => acetylcitrulline => arginine	91687.8	90089.9	58084.2	53343.3	80418.4	69171	50307.9	94192.3	75857.6	90225.9	70746.2	95756.1	56793.9	57739	81365	65066.5	68980.9	95510	46871.1	78860.9	49671.2	90333.8	68841.8	46596.1	48230.8	64649.8	61528	67394	111565	87311.5	1.04973	0.0700142	0.969949	-0.044
M00854	Glycogen biosynthesis, glucose-1P => glycogen/starch	60817.9	69272.3	57082.4	55629.9	88845.2	78431.6	47061.6	119784	75288.3	91164.7	52868.1	96240.8	43777.2	60423.8	89378.2	43144.4	66353.8	84800.9	37615.6	69225	58319.2	76028.7	57106.1	83440.6	41262.8	59959.8	126097	54003.2	137972	70061	1.15462	0.207422	1.18704	0.247
M00432	Leucine biosynthesis, 2-oxoisovalerate => 2-oxoisocaproate	90622.9	88091.5	58966.3	54116.3	95897	71625.4	51640.5	88747.8	71678.2	71531.8	71329.8	97040.6	56877.2	57690.2	85133.6	62223.7	68952.4	93519.4	50877.2	80006.2	54577.8	86638.3	66187.7	45057.7	46887.3	63766.2	64736.5	63703.8	108556	78684.5	1.02663	0.0379098	0.938016	-0.092
M00060	KDO2-lipid A biosynthesis, Raetz pathway, LpxL-LpxM type	149564	113237	41430.9	60365.5	38340.6	62741.2	39642.1	58690.9	82871.8	88903.2	70836.7	79805	72341.2	58435.1	55290.1	77957.3	67344.9	117641	54348.3	69318.3	37262.9	98476.5	80453.6	66184.7	59429.1	45685	42203.3	71911.4	40532.3	122590	1.01724	0.02466	0.919	-0.122
M00631	D-Galacturonate degradation (bacteria), D-galacturonate => pyruvate + D-glyceraldehyde 3P	88350.2	94442.6	46432	49093	127159	81113.6	36679.3	101911	72880.2	39227.9	61373.7	79484.2	46458.8	45025.8	90908.8	55280.7	54710	100250	30799.9	74881.1	59239.1	76098.2	67065.8	44739.7	38935.2	63050.3	46621.8	67365.8	116833	88185.3	1.1535	0.206023	1.04531	0.064
M00028	Ornithine biosynthesis, glutamate => ornithine	86988.1	85651.5	56480.5	51972.3	80541.8	67674.9	49329.6	76961	67625	64125.8	69239.9	92282.1	54917.1	55664.8	78845.7	60380.6	66565.5	91608.3	48947.9	78067	49252	80198.3	63927.4	43618.7	47092.8	61372.3	63106.7	61052.6	104631	74464.1	0.986837	-0.0191169	0.931369	-0.103
M00377	Reductive acetyl-CoA pathway (Wood-Ljungdahl pathway)	67260.6	65494	50073.1	72174.9	73502.3	89286.4	46046.6	94092.2	76080.3	61941.3	47844.7	76767	49970.9	70170.1	89008.4	43727.2	74356.7	79226.9	42637.2	58712.1	69085.1	68513.1	70494.1	60862.1	65286.3	52980.3	83535.6	61002.6	89033.9	68257.3	1.10046	0.138101	1.08954	0.124
M00609	Cysteine biosynthesis, methionine => cysteine	60238.2	63576.1	52659.6	72484.8	70272.7	89500.6	49353.1	97458.9	75581.4	77737.5	49002.6	70158.7	51359.5	72730.7	86265.3	43687.2	72392.4	73621.5	42505.4	57752.3	66995.8	71539.1	69929.6	60878.5	63051	55194.7	78650.7	61122.1	86028.2	70859.5	1.14429	0.194458	1.10456	0.143
M00357	Methanogenesis, acetate => methane	66250.5	61435.3	50723.7	65926.5	69244.7	84802.2	43648.7	103665	81410.9	83396.6	47260.9	72238.1	44788.7	62107.1	80775.9	42427	64659	74391.9	33894	51759	66715.7	72340.6	63921.6	77318.4	59365.6	48097.6	95004.1	58778.7	84935.6	75037.5	1.23716	0.307034	1.22151	0.289
M00116	Menaquinone biosynthesis, chorismate => menaquinol	108781	76868.9	33987.7	68081.5	40516.6	76361.9	38382.8	72985.7	87010.9	73251.7	57164.8	66724.1	61415.2	66163.6	60667.1	59472.4	68445.4	95619.1	46352	55008.3	48695	89365.6	82477.4	53104.8	72150	45927.8	35910.6	64929.6	40142.6	106132	1.06153	0.0861451	1.00283	0.004
M00846	Siroheme biosynthesis, glutamate => siroheme	71045.7	80533.4	51691.8	39903.8	80797.1	58962.6	34245.4	86948.8	62416.5	66377.4	49893	103951	36368.2	35807.6	97549.5	43686	61432.9	95579.2	31723	75400.3	45936.4	92468	50666.1	32302.6	33203.4	57108.5	54447.9	47966.9	128868	63864.7	1.00243	0.00349612	0.961104	-0.057
M00532	Photorespiration	93124.9	86161	39395	53458.3	62406.7	62234.6	35777.7	90638.5	72758.4	71909.1	50222.3	79487.2	49649.5	53899	63842.3	48832.1	62296.6	91228.2	40213.2	56291.3	47819.8	90325.4	54601.4	49315.4	51491.4	44303.1	57256	53649.3	67239.6	86206.5	1.12065	0.164335	1.01048	0.015
M00034	Methionine salvage pathway	54473.5	57204.6	51849.9	67176.6	72747.1	83559.3	48016.6	93922.1	65382.9	66139.1	45586.7	74757.1	45780.2	68309.2	75029.9	40542.9	68736.7	64542.8	38171.1	52017.2	58084	65021.4	68350.1	47456	51975.9	54728.6	72527.9	54166.8	86993.9	57652.5	1.1517	0.203769	1.07582	0.105
M00061	D-Glucuronate degradation, D-glucuronate => pyruvate + D-glyceraldehyde 3P	71549.8	89629.6	43379.3	42849.9	109308	72891.5	32998.4	91371.1	63911.6	33308.8	52974.5	69765	39027.8	39316.5	83054.1	46374	48452.4	85152.3	25659.6	68091.4	51070.5	75268.6	58082.8	37890	33794.2	58343.3	44862.1	59040.5	113552	77022.3	1.1673	0.223174	1.09152	0.126
M00535	Isoleucine biosynthesis, pyruvate => 2-oxobutanoate	82530.4	77498	46285.7	46267.8	79757.7	60504.6	41787.1	71292.2	61646.2	59464.9	60655.7	80798.3	49563.6	48506.6	68844.5	54854.1	58080.6	81975.8	42831.4	66852.1	45402.8	73691	57692.6	41070.1	39396.3	52683.8	52258	55975.1	84316.7	71120	1.02296	0.032746	0.935794	-0.096
M00119	Pantothenate biosynthesis, valine/L-aspartate => pantothenate	90428.4	81712.3	42736.8	44518.5	58934.8	55407.1	37053.9	73917.4	66063.3	70032.3	55046.2	75638.1	47853.4	45708.5	59895	52563.8	54733	89742.7	38491.7	59219.6	37802.1	84887	57498.7	49025.9	41845.4	47925.9	54632.8	52088.2	71903.6	83213.3	1.0724	0.100845	1.00334	0.005
M00579	Phosphate acetyltransferase-acetate kinase pathway, acetyl-CoA => acetate	43965.9	51279.8	47319.7	59102.1	70207	78004.9	40957.8	99471.2	70910	69802.6	39429.2	63252.2	39016.1	59133.8	79248.2	33027.1	60374.5	60211.1	31927	48516.9	63705.9	55897.9	52542.8	69142.4	54254.7	44118.4	89836.6	51736.6	86809.4	58035.4	1.22734	0.295538	1.21773	0.284
M00565	Trehalose biosynthesis, D-glucose 1P => trehalose	54873.8	64324	48014.7	34346.6	78772.7	59184.5	35799	99037.7	61315.3	70177.6	48356.4	83712.4	34556.7	39393.3	71479.5	39135.8	50016.6	75582.6	28925.9	62315.2	44423.3	61874	42883.6	60940.8	24338.1	52748.5	95110.2	44483.2	125585	61496.3	1.13566	0.183532	1.15073	0.203
M00015	Proline biosynthesis, glutamate => proline	65449.2	65282.6	43707.8	44678.1	67852.2	57693.8	40771.6	86491.6	62951.1	72806	52943.2	75211.3	44916.6	52753.1	63711.8	45788.9	54335.4	73118.9	38856	59969	39170.6	60713.8	52783.3	42296.6	36776.9	50294.4	59562	50018.2	89437.1	67293.5	1.08205	0.113768	0.976393	-0.034
M00020	Serine biosynthesis, glycerate-3P => serine	68574.3	63600.5	41315.5	39720.8	87470.4	69733.6	39355.1	86852.4	59990.2	58146.3	54081.6	70020.6	42856.8	44534.7	54985.5	45484.8	54334.5	69466	37670.9	56504.6	48804.5	60965.2	67502.5	32292.6	31033.9	57706.1	47128.4	47393.5	89876.1	66429.5	1.16005	0.214192	1.03622	0.051
M00029	Urea cycle	58064	58554	44743.1	42508.2	62003.6	50777.4	41441.1	75756.2	55539.6	82312	49770	70357.4	41643.6	48202.3	62512	44920.1	53732.3	62685.2	35975.9	56732.2	35426.1	75905.1	51649.7	49705.4	35808.3	48457	70864.8	47931.1	87477.2	62283.7	1.08578	0.118738	1.07403	0.103
M00093	Phosphatidylethanolamine (PE) biosynthesis, PA => PS => PE	65505.4	55734.9	38951.3	63636.9	52649.9	73538.7	36021.3	67992.1	61486.3	58349.3	37729.7	59580.8	42707	56089.2	68464.2	38699.8	59594.2	71879.2	32304.4	41418.7	57463.6	57921.8	60198.4	49806.1	60348.2	38319.1	54017.2	50995.7	51146.3	59504.4	1.12862	0.17456	1.06147	0.086
M00052	Pyrimidine ribonucleotide biosynthesis, UMP => UDP/UTP,CDP/CTP	56322.8	56189.7	42689.8	54809.5	50254.7	63729.4	38042.8	82495.3	61968.2	77636.1	38608.7	62290	39587.6	54455.9	66572.4	35489.7	56151.7	66134.8	32194.5	44297	47870.7	60081.7	51455.8	44173	49668	40226.6	59793.2	45376.4	69534	57891.8	1.17822	0.236603	1.06109	0.086
M00008	Entner-Doudoroff pathway, glucose-6P => glyceraldehyde-3P + pyruvate	50839.6	52717.3	37452.8	57204.7	72936.2	76708.5	37450.5	78064.8	60270.7	48457.4	40047.7	54679	42122.7	58639.7	65845.7	35842.3	58123.6	61170.6	33683.1	45402.8	54082	51393.5	57694.3	47498.7	47398.2	44157.8	54471.5	50894.4	64574.5	57081.7	1.15446	0.207222	1.06798	0.095
M00844	Arginine biosynthesis, ornithine => arginine	57196.1	58370.7	43682.4	38235.1	59729	47452.2	39275.3	75362.7	54938.2	76476.9	49514.5	67836.1	40336.9	44199.6	59888.7	44460.4	51582.4	62019.6	35439.2	56313.4	35197.5	69978.7	48640.8	30945.3	34527.6	47287.9	49112.1	46800.2	86558.7	60279.5	1.07648	0.106325	0.995578	-0.006
M00035	Methionine degradation	57930.4	58913.3	35437.9	45937	64531.4	64856.8	29180	74357.1	55818	41403.4	36246	84188.7	33263.1	43264.1	79536.1	32598.3	56877.2	75028	28475.1	57537.4	46443.3	52718.2	54179.1	33213.1	37707.7	46018.5	47234	41785.5	103405	50666.7	1.00256	0.00369419	0.974113	-0.038
M00577	Biotin biosynthesis, BioW pathway, pimelate => pimeloyl-CoA => biotin	95873.3	75425.5	26324.5	41766.4	45234.7	59628.8	25543.7	45729.3	60254.9	59080.5	50609.2	65488.9	45618.9	37875.3	48951.7	51284.6	49682	80626.1	33628.9	53136.8	37341.8	57434.9	66581.1	47223.9	39949.3	43810.1	30106.3	51904.2	50051.3	78149.9	1.03474	0.0492738	0.972239	-0.041
M00123	Biotin biosynthesis, pimeloyl-ACP/CoA => biotin	95833.5	75424	26320.1	41724.4	45127.2	59614.7	25539.8	45723.8	60234.9	59072.4	50517.7	65465.1	45614.6	37869.2	48899.8	51272.9	49660.9	80621.8	33617.4	52985.4	37205.8	57405.3	66423.8	47103.9	39914.9	43735.8	29996.3	51891.4	49856.6	78104.9	1.03502	0.0496617	0.97118	-0.042
M00006	Pentose phosphate pathway, oxidative phase, glucose 6P => ribulose 5P	48280.8	43864.6	27582.9	62764.6	54747.4	74774.1	34561.8	74756.3	61841.6	55909.5	30828.4	48347.1	43691.7	66319	63852.2	29717.6	61215.4	56224.8	38822.3	38653.1	55924.5	41700.1	55770	54349	55334.3	34398.9	54068.2	47283.7	43163.6	54083	1.12857	0.17449	1.03853	0.055
M00552	D-galactonate degradation, De Ley-Doudoroff pathway, D-galactonate => glycerate-3P	49755.9	46884.1	39984.3	52766.8	56096.7	62643.8	36016.8	74697.3	55827.5	64139.8	36126.8	58481.3	36710.2	51023.4	65398.9	32790.1	52907.4	58928.4	30352.3	42334.1	48609.3	55285.2	48656.5	42845.5	46036.3	38622.3	57678.4	43641.9	65467.3	51522.6	1.15861	0.21239	1.07163	0.1
M00095	C5 isoprenoid biosynthesis, mevalonate pathway	11567	17425.6	39947.2	80408.9	55903.5	91296.8	36015.5	98105.9	61573	63955.2	11572.5	38820.4	28306.8	70360.1	83968.4	11530.5	61514.4	39816	18153.8	17434.2	77746.8	39420	53431.3	64660.6	74759.6	31256.2	77715.8	44757.2	46047.9	34054.9	1.45801	0.544004	1.42564	0.512
M00166	Reductive pentose phosphate cycle, ribulose-5P => glyceraldehyde-3P	49806.1	47125.8	39979.3	52741.6	49042.9	61580.7	35762.7	71072.8	55174.2	64013.1	35863	57329	36687.5	51049.2	63908.7	32777.3	52874.8	58798.4	30345	42163.9	46358.5	54489.2	48639.5	42780.7	45981.6	38181	57483.6	43114	64715.7	51090.7	1.13968	0.188624	1.06721	0.094
M00033	Ectoine biosynthesis, aspartate => ectoine	54174.7	53162.6	34701.9	41147.1	54005.6	51033	34264.3	68359.5	48162.4	60258.5	38703.8	60945.4	36725	47354.2	50418.4	33895.4	46253.9	61321.9	32051.2	45063.7	30488.9	59353.6	44092.5	51226.9	29288.9	39624.6	71330.9	37457.3	72340.7	53607.9	1.10279	0.141159	1.07969	0.111
M00114	Ascorbate biosynthesis, plants, glucose-6P => ascorbate	46571.8	42963.2	46597.3	52290.5	53131.4	58679.9	40531.3	67867.2	52449.4	56055.8	41924.8	48284.1	39367.2	53237.4	55604.6	36356.7	49197.4	53636.8	30626.3	38020.7	45255.5	53878.3	42182.9	41490.5	49232.4	35867.5	57214.8	45655.8	51790.7	49510.6	1.15884	0.212677	1.05787	0.081
M00307	Pyruvate oxidation, pyruvate => acetyl-CoA	62249.1	59357.6	29447.3	30078.4	48424.1	42883.4	25949.6	89932.6	58983.6	92300.6	37124.4	67072	30028.6	33090.7	43236	33888.8	41144.7	67941.1	23577.2	40512.3	29674	66480.5	43961.9	26922.1	29409.8	37049.5	39605.8	34912.9	70676.1	65785.6	1.29211	0.369731	1.06432	0.09
M00122	Cobalamin biosynthesis, cobinamide => cobalamin	53340.3	65240.8	29100.8	21449.7	88169.5	63387.6	11700.1	98580.3	46700.2	16445.7	25451.4	74339.6	11121.6	11912.8	79531.2	19586.9	33664.2	78024.4	8853.5	56509.7	50603.1	50598.8	44552.3	16593.3	17390.7	55254.4	42607.1	29692.2	135477	47446.3	1.2384	0.308475	1.22862	0.297
M00124	Pyridoxal biosynthesis, erythrose-4P => pyridoxal-5P	79868.6	69499.2	27933.9	34154.5	52177	47396.3	25911.3	61099.6	54751.4	53894.3	43286.1	57552.8	39110.2	34728.3	42034.1	42311.5	42823.2	71550.1	30219	44702.4	32299.9	53335.6	46759.6	33696.9	31057.6	34871.4	30711.4	41995.5	50947.7	69166	1.13019	0.176571	0.947635	-0.078
M00740	Methylaspartate cycle	60010.2	71424.4	35588.1	32048.6	55829.8	40736.9	29828	58795.8	43998.3	38750.4	40935.3	66896.2	33722.8	34653.6	55124	35310.8	43578.6	69914.4	32026.3	50778.9	31670.4	57441.7	32481.5	24487.7	27105.5	36875.5	46556.8	34524.5	70807.7	47481.2	1.00879	0.012627	0.884416	-0.177
M00840	Tetrahydrofolate biosynthesis, mediated by ribA and trpF, GTP => THF	61598.3	51650.6	28483.9	41183.8	45199.1	51146.2	26679.4	59559.7	48893.2	49304.9	35528.4	52409.9	36252.1	40050.2	47751.4	35141.1	44081	62167.3	27715.5	38283.2	35999.2	55338.8	47070	37541.8	37408.8	35856.6	41226.6	40685.3	49926.7	58065.3	1.10568	0.14493	1.04707	0.066
M00849	C5 isoprenoid biosynthesis, mevalonate pathway, archaea	10444.7	16125.8	34897.2	67671.4	51042.5	77637.2	30840.8	84143.9	51865.9	52099.8	10864.1	34510	24073.3	58936.7	72496.1	10451.5	52027.5	34768.2	15428.6	16056.4	66545.5	34648.7	45269.3	54335.1	62692.9	27524.9	66767.1	38385.5	41620.4	28716	1.44645	0.532521	1.41531	0.501
M00373	Ethylmalonyl pathway	62669.6	61743.8	27960.9	37160.3	46840.5	47507.8	21751	52971.9	44475.2	26202.4	34709.7	51344	31109.9	32162.6	47586.5	34219.4	38719.8	65031.7	21815.1	37959.7	35997.1	48627.3	40215	36790.4	37290.5	29116.3	36589	38310.5	43200.5	51535.5	1.08773	0.121325	1.00764	0.011
M00014	Glucuronate pathway (uronate pathway)	47067.2	52439.3	18537.3	22407.2	81120.7	46422	16953.9	79020.5	46702.1	44463.3	27279.4	61713	21341	22251.3	52529.1	23495.2	36179.2	55032.4	18322.6	40146.7	39629.8	50912.8	34928.2	21244.8	18815.9	35423.8	34550.2	30741.6	82928.1	54888.2	1.27029	0.345163	1.12776	0.173
M00021	Cysteine biosynthesis, serine => cysteine	45860.4	53058.4	35079.3	26772.5	40924.4	37259.2	26015.2	60348.5	43771.9	62191.4	37174	54253.7	26009.7	26469.2	43791.8	32849.9	31799.1	51299.9	17917.2	38331.7	26509.6	53140.6	34310.4	41010.3	23901.1	35883.5	57947.8	35200.7	65428	51159.4	1.19835	0.261048	1.17948	0.238
M00036	Leucine degradation, leucine => acetoacetate + acetyl-CoA	61612.3	57766.8	25558.8	26873.6	43952.6	33982.2	22772.3	63058.5	44182	52756.5	34196.1	53252.4	30459.4	31037.6	36626.2	32217.8	37574.8	66684.1	26269.6	37296.2	24963.2	61914.3	29298.9	31925.5	24898.7	28565.7	44096.3	29678.1	49382.2	54989.3	1.12163	0.165594	0.984695	-0.022
M00841	Tetrahydrofolate biosynthesis, mediated by PTPS, GTP => THF	45166.1	43620.9	27928.7	37922.6	35367.8	43411.7	25604.8	51994.2	42829.8	43411.4	29512.6	52704.5	30428.2	37776.5	56055	27601.7	41604.7	55985.4	26353	40516.4	31071.2	41601.2	38137.2	30238.8	31088.7	32118.4	42083.4	33866.6	56848.2	41677.6	0.996788	-0.00464094	0.950302	-0.074
M00159	V/A-type ATPase, prokaryotes	40289	71057.5	16294.1	15254.1	105499	63700.3	8290.93	106712	34792.3	13625.4	16740.2	73562.3	3399.82	6400.89	38610.6	10665.7	24610.6	50645.3	3508.71	26550.7	54622.3	59676.1	38931.2	9089.94	6616.28	44349.7	47449.4	17880.1	105948	32996.1	1.867	0.900722	1.63945	0.713
M00063	CMP-KDO biosynthesis	78096.6	58014.3	27416.2	32025.6	23421.5	34916	23509.3	31875.2	43051.2	55530.8	39892.4	43622.7	37653.3	29647.6	30799.7	42762.1	35298.5	62331.7	26426.7	35872.5	20959.8	51335	43119.8	33749	31252.8	26311.1	22564.3	38844.2	23461.5	62352.7	1.06128	0.0858027	0.921009	-0.119
M00573	Biotin biosynthesis, BioI pathway, long-chain-acyl-ACP => pimeloyl-ACP => biotin	67695.4	57416.2	19711.1	29293.2	34285.5	42557.5	17994.3	35612.5	42721	42696	35149.7	48843.1	31479.8	26092.8	37127	35619.4	35636.2	59296.7	23209.5	38122.8	27326.2	42665.6	46231	32198.8	27866.5	31798.8	23002.6	36104.5	40390	54825.5	1.05237	0.0736368	0.97796	-0.032
M00718	Multidrug resistance, efflux pump MexAB-OprM	75587.7	62139.5	19301.5	30615.3	20110	31675.1	19909.2	24917.5	41199.4	50700.6	37178.8	43779.8	35204	27707.5	29712.2	41504.3	34997.5	57831.2	25033.5	36262	19145.7	54201.8	43177.6	35698.2	33775.8	23738	24811.2	38937	23097.9	60188	1.01881	0.0268858	0.966308	-0.049
M00012	Glyoxylate cycle	49818.4	57342.4	30509.3	26905.1	44841.6	34171.2	25526.2	46579	36953.5	35383.3	35418.8	51861.7	28640.2	28471.5	42925.4	30863.5	34626.8	53575.4	25406.5	40154.9	26533.4	47768.4	28945.3	21960.7	23576.3	30587.5	35903.7	30872.9	52601.5	41757.5	1.04325	0.0610805	0.915478	-0.127
M00554	Nucleotide sugar biosynthesis, galactose => UDP-galactose	23754.7	29069.6	31113.7	41762	41527	51107.1	28601.2	56535.7	41410.9	38211.2	24605.1	40276.3	26404.9	42316.1	51935.8	20413.6	41925.9	39829.2	22435.8	30935.8	39665.9	32775.1	36243	32158.1	36926.7	29657.5	48151.9	32244.7	53105.5	31471.2	1.12318	0.167591	1.09183	0.127
M00025	Tyrosine biosynthesis, chorismate => tyrosine	36589.4	38305.2	38821.9	26618.5	49090.2	35139.1	31505.4	46660.3	31332.2	36339.4	38370.9	51693.2	27953.4	30611	47482.3	31137.6	35628.5	45925.5	25674.5	43129.6	26159.4	44853.9	26529.6	16397	21085.1	35957.4	40326.7	31294.3	69951	30125.9	0.98092	-0.0277927	0.907506	-0.14
M00344	Formaldehyde assimilation, xylulose monophosphate pathway	31403.4	31535.2	25003.4	29756	63279.5	48979.4	21451	64291.2	39918.9	47935.5	22862.2	48962.1	20773.5	28380.5	54137.7	19756.4	37754	44707.5	17052.7	33744.6	38761.1	34887.7	31518.8	24021.3	24470.2	28671.5	36810.5	28736.6	68930	35212.5	1.22986	0.298489	1.0728	0.101
M00129	Ascorbate biosynthesis, animals, glucose-1P => ascorbate	40280.6	35903.9	19493.9	36225	33969.1	43287.3	21450.8	56363	44856.7	59475.1	22667.2	43484.2	25564.4	36919.7	40969.4	21539.8	36736.2	40747	20900.6	29166.6	29387.3	39736.1	36178.8	38916.7	30118.7	24340.4	45790	29529.1	45779.3	46418.3	1.22784	0.296118	1.14904	0.2
M00005	PRPP biosynthesis, ribose 5P => PRPP	26216.8	28118.8	26678.1	40989.7	39404.4	50145.5	25658.8	55561.9	40302.6	42137.8	20923.9	39261	25211.9	41084.6	51429.1	18376.9	41632.2	38093	22406.9	29249.2	38906.7	29624.7	36033.1	31771.9	35943.4	27168.7	42919.6	30121.9	51703.1	30954.8	1.1451	0.195477	1.08386	0.116
M00024	Phenylalanine biosynthesis, chorismate => phenylalanine	46582.9	43206.4	31937.6	26573.2	38882.1	33608.4	26822	40194.4	34200.5	31596.1	37055.6	44495.3	29224.5	28766.3	38350.1	33219.2	32870.6	46505.9	24109.1	38831.7	22513.1	45730.8	30325	21108.5	21522.6	31799.7	32076.2	32937.2	51191.3	40321.2	1.0005	0.000716744	0.93237	-0.101
M00848	Aurachin biosynthesis, anthranilate => aurachin A	35331.8	33473.3	24420.2	28878.3	45427.3	44585.1	17247.6	56409.3	36849.9	31762.5	21365.5	50257.5	17449.8	23372.9	51894.1	19682.6	33969.3	50809	11717.1	31665.8	33734.1	33269.4	32985.2	22883.5	23989.3	31036	35872.1	27162.4	66404.1	31785.9	1.13518	0.182924	1.08629	0.119
M00086	beta-Oxidation, acyl-CoA synthesis	56207.6	52589.9	18232.1	28458	28441	26550.5	23362	31851.2	34428.8	27927	32338.2	34292.4	36369.6	37044.4	29856.8	32222.8	34140.3	47249.4	36414.4	38505.5	18762.3	45333.4	32816	26390	22142.5	22556.4	27234.3	30536.8	25004.3	50062.6	0.915226	-0.1278	0.839314	-0.253
M00873	Fatty acid biosynthesis in mitochondria, animals	47785.5	42886	18002.7	22273.7	35182.2	33836.9	14068	52638	38540	41096.7	24537.5	50194.8	20162.5	19129	39836	23818.2	28916.7	50782.6	14877.1	33921.3	24320.8	46042.9	33467.9	21601.2	18678.2	28999.5	28591.4	26371.4	59061.6	45147.2	1.13108	0.177703	1.08527	0.118
M00364	C10-C20 isoprenoid biosynthesis, bacteria	25644.8	24526.4	24711.5	38725.4	29257	44424	22793.3	48883.4	37041	41116.3	18633	32441.2	22557.2	36897	42959.2	17376.7	35791.6	34224.5	17873.9	22383.1	34555	30773.2	32507.1	31565.9	35023.8	22729	39933.9	27905.6	36596.8	30135.5	1.19914	0.262001	1.14437	0.195
M00010	Citrate cycle, first carbon oxidation, oxaloacetate => 2-oxoglutarate	26982.1	46572.1	34423.7	20415.9	48612.6	26644.8	26233.6	47703.2	26221.4	33820.7	28725.9	50902.7	19415	23522.3	45841.8	20669.6	29717.3	44281.6	20925.7	36431.3	24149.6	37021.1	13893.9	9334.27	15732.9	27734.8	39263.5	20383	63797.8	19929.7	1.05367	0.0754209	0.846481	-0.24
M00172	C4-dicarboxylic acid cycle, NADP - malic enzyme type	43082.8	36822.8	23204.9	31481.5	28242.2	36447.9	20607.6	33487.6	33283.4	25694.4	26231.8	35410.6	25980	28892.6	35682.9	25777.7	32695.8	43061	20735.9	28460.5	26793.3	37625.6	32761.8	29171.1	28775.4	23155.5	34996.4	28736.7	32746.8	36359.3	1.03112	0.0442091	1.02705	0.039
M00079	Keratan sulfate degradation	65606.7	43639	12430.2	25521.1	18138.1	30525.5	13856.3	22463.3	36854.9	25418.7	32248.4	36392.7	29883.4	23575.4	22913	32966.1	27556.5	51743	21013.4	30756.5	16354.4	43044.3	35812.4	30014.2	33154.8	21067.3	23197	32326.4	19702.6	54964.9	0.952775	-0.0697918	1.00191	0.003
M00868	Heme biosynthesis, animals and fungi, glycine => heme	43233.2	40661.3	20523.3	18260.3	38190.3	27815.1	13830.7	46646	31496.1	50211.8	20910.2	50099.4	17444.4	15284.8	39371.7	22062.9	28295.9	54210.9	12508.8	28380.5	22453.6	47347.6	25443.2	15983.6	15010.7	24466	20452.7	21123.1	52528.2	39844.3	1.14658	0.197338	0.986428	-0.02
M00153	Cytochrome bd ubiquinol oxidase	40057.2	30603.7	17878.5	37706.4	19456.2	42281.1	18217.4	42670.5	41395.6	38890.5	19363.8	28350.1	24134.2	33588.6	34563.8	21283.2	33613.4	39374.8	16387.4	19569.9	31703.1	33771.4	37504.4	28370.2	37750.8	18981.4	23593.7	29417.1	19972.1	42238.2	1.21807	0.284593	1.12239	0.167
M00725	Cationic antimicrobial peptide (CAMP) resistance, dltABCD operon	4054.5	5165.2	20090.8	51606.1	20448.5	54638.3	21709.8	56558	40065.8	47687.5	3821.34	17499.8	16894	45390.6	45498	4639.5	38717.1	19467.3	11325.5	6361.7	44787	27908.2	33952.5	43983.2	48004.7	16335.8	54779.4	25325.8	19264.7	24312.6	1.53627	0.619429	1.6156	0.692
M00366	C10-C20 isoprenoid biosynthesis, plants	23998.2	23173.5	22876.8	35870.2	27755.8	43579.3	18884.4	47467.1	35023.9	33468.5	16075.9	30491.7	19176.5	32202.6	41068	15380.8	31795.4	33624.1	12782.9	19244.8	34113.4	27392.5	30314.6	29889.8	33413.4	21704.5	35270.5	26730.6	35035.8	28401.1	1.23926	0.309474	1.20022	0.263
M00149	Succinate dehydrogenase, prokaryotes	55315.4	41871.3	15327.1	24075.1	26263.2	25769.1	17643.7	29542.5	32688.7	22712.3	28480.5	30975.7	30293.2	27864.5	22358	28101	27652.5	45348.5	27103.9	28972.5	18312.7	41580.9	29381	23945.9	22880.6	18869.9	18408.2	26060.9	18089.5	48336.6	0.980003	-0.029142	0.894719	-0.16
M00089	Triacylglycerol biosynthesis	28246	27404.6	16717.5	26137.5	36364.2	36727.2	15125	43668	30569.2	28393.5	16166.8	36459.2	17249.6	24064.8	40256.8	15628.5	30740.1	38333.7	14744.3	25259.9	28415.1	28756.8	28895	21863	22320.4	22468.3	29108.5	22063.6	46746.4	28165.8	1.11761	0.160414	1.07686	0.107
M00741	Propanoyl-CoA metabolism, propanoyl-CoA => succinyl-CoA	55644.6	47526.5	13531.9	23187	16263.2	24531.3	16239.1	21118.7	30677.1	23098.2	28699.3	33885.3	29049.9	26935.4	20967	28886	29236.3	49264.2	26208.8	30241.5	14227.2	32917.6	27676.5	23634.8	24201.4	17009.7	18563.1	25316.5	18489.4	43108.1	0.895983	-0.158457	0.808061	-0.307
M00375	Hydroxypropionate-hydroxybutylate cycle	24703.3	30066.8	20630.2	24115.7	44605.8	32975.1	14386.3	44300.4	26087.3	12124	17780.4	32955.3	15313.7	19771.5	37128.2	15735.4	23468.4	32196.8	10579.7	22709.2	29594	28771.4	22048.3	21935.6	21528.3	19507.9	27489.4	22936.5	35707.9	22212.6	1.20364	0.267404	1.10584	0.145
M00627	beta-Lactam resistance, Bla system	17337.2	28498.3	17231.3	27837.1	24712.9	37080.7	11402.9	34062.8	32996.4	17948.6	10957.5	36749.8	12778	21092.5	53728.6	10755.3	32340.9	33674.6	9628.39	28174.3	32681.2	19414.8	23569	19695.8	28019.3	17923	21210.5	24604.6	46322.7	20706.6	0.996912	-0.00446188	1.01708	0.024
M00170	C4-dicarboxylic acid cycle, phosphoenolpyruvate carboxykinase type	24172.8	20286.8	15946.3	32664.8	24609.4	38526.8	16432.3	30853.5	28515.3	26419.7	12865	25987.8	18497.2	28896.9	36161.6	13700.2	32100.1	32695.8	15545.7	18213.1	30425.6	22002.7	27942	29825.5	28043.2	16097	34574.3	21184.3	25675.6	22938.8	1.10127	0.139169	1.10247	0.141
M00368	Ethylene biosynthesis, methionine => ethylene	25110.9	24184	20094	26291.8	24464.4	31288.9	17678.2	35331.2	27574.9	29391	17982	28990	18318.4	25537.4	31690.3	16428.4	26345.5	29655.7	15158.6	21164.8	23300.5	26174	24691.7	21193	22970.2	19202.8	28779.8	21719.4	33158.8	25067.5	1.13032	0.176725	1.0648	0.091
M00135	GABA biosynthesis, eukaryotes, putrescine => GABA	32999.1	27186.4	18507.3	26228.4	23137.8	33437.9	15212.2	25983.6	28167.2	15143.8	21354.3	28458.2	20442.6	22757.7	31057.8	21001.7	25148.4	34104.5	14218.4	23419.6	23156.4	33371.9	28668.5	17627.1	22733.5	20968.9	15341.1	25885.8	24478.1	31392.5	1.0167	0.0238927	1.00686	0.01
M00842	Tetrahydrobiopterin biosynthesis, GTP => BH4	42402.2	33546.7	13317.7	19890	18395.8	20385.2	13254.1	24332	26567.9	22732.7	21800.3	32966.6	21759.8	19589.2	25204.6	22276	23302.2	42711	18436.6	25646	12494.5	34918.6	23929.5	27630.9	15560.2	17706.8	31364.4	20480.6	23043.9	35022.1	0.925626	-0.111499	0.954509	-0.067
M00843	L-threo-Tetrahydrobiopterin biosynthesis, GTP => L-threo-BH4	42402.2	33546.7	13317.7	19890	18395.8	20385.2	13254.1	24332	26567.9	22732.7	21800.3	32966.6	21759.8	19589.2	25204.6	22276	23302.2	42711	18436.6	25646	12494.5	34918.6	23929.5	27630.9	15560.2	17706.8	31364.4	20480.6	23043.9	35022.1	0.925626	-0.111499	0.954509	-0.067
M00169	CAM (Crassulacean acid metabolism), light	39410.7	35456.9	17687.9	18206.3	23051.7	24357.3	13578.8	27896.7	27224.4	18011.9	23713.2	30564.9	19260.3	16166.8	24352.8	23185.7	20927	35325.4	13355.7	24935.6	16317	34568.9	25549.7	18421.3	17657.5	20593.8	20274.8	23781.4	31418.8	35638.4	1.0565	0.079288	1.05364	0.075
M00117	Ubiquinone biosynthesis, prokaryotes, chorismate => ubiquinone	39541.4	23939.3	16103.1	23574.6	21943.5	27969.6	13548.4	28407.6	29864.8	38444.6	19002.9	29841.9	18643	18058.4	29284.8	20143.9	25701.2	34334.9	13877.4	20016.9	25578.3	27430.7	25771.4	17933.6	24551	15421.9	10830.7	22845	17467.8	31662.2	1.15042	0.202159	0.95888	-0.061
M00150	Fumarate reductase, prokaryotes	14522.6	12576.1	17737.9	30029.9	21555.2	34770	18186	31537.8	33723.3	42242	11929.4	18049.6	13579.4	23128	30179.2	14369.1	29304.4	12606.2	9346.19	10705.4	28508.8	26692.6	37732.5	38286.8	31382.8	13829.7	39512.4	22263.5	20575.6	22446.8	1.48317	0.568687	1.62377	0.699
M00141	C1-unit interconversion, eukaryotes	24260.7	23282.9	18934.6	24295.6	22460.6	29041.8	14872	33510.4	27467.3	28256.9	16045.8	31032.2	15640.8	21354.2	31893.6	15628	24310.9	29179.9	10563.5	19002.3	22282.5	24497.4	21351.4	20357	22166.4	17029.5	24462.5	21446.5	32038.5	24408.3	1.14783	0.198907	1.07169	0.1
M00088	Ketone body biosynthesis, acetyl-CoA => acetoacetate/3-hydroxybutyrate/acetone	10061.4	14148.5	20537.9	29750	40032.8	37429.3	15458.3	45872.2	23754.2	17162.8	9613.59	23434.3	11816.9	24663.2	39483.8	8248.91	24364	24184.8	7318	12735.5	33950.2	22785.7	20710.8	23591.8	26465	16758.7	32973.2	19686.4	29111.3	14180.3	1.36772	0.451768	1.29242	0.37
M00168	CAM (Crassulacean acid metabolism), dark	35049.7	26867.3	12708.1	26367.6	14107.9	27022.2	14800	17315.8	24621.8	20218.4	18345.7	21333.9	22362.4	25401.3	22571.5	19513.1	25833	31084.1	18768.3	18877.7	19090.2	25427.3	25948.5	26311.9	24099.3	13671.2	23866.5	21725	9636.3	28576.4	0.977634	-0.0326342	0.974392	-0.037
M00171	C4-dicarboxylic acid cycle, NAD - malic enzyme type	23584.6	22012.1	18230.9	24100.8	23490.5	28651.5	16080.1	25874.6	22747.4	17233.5	17158.5	25872.1	17242.6	22256.6	29255	15396.5	24425.7	27828.9	14838.7	19990.9	22059	23847	21980	20500.4	20556	17260.7	29675.1	19105.8	27752.2	19992.3	1.03613	0.0512006	1.0395	0.056
M00032	Lysine degradation, lysine => saccharopine => acetoacetyl-CoA	34591.6	33552.5	10112	12541.3	20219.3	14800.1	9644.68	31093.5	21347.8	24104.1	15659.5	25180.9	15780.8	15318.4	14392.9	16270.1	19197.7	36547.7	13585.6	15862.9	11456	33763.9	13496.4	11499.1	12514.2	12357.8	16511.8	13970.5	16733.4	29025.4	1.12892	0.174942	0.91231	-0.132
M00076	Dermatan sulfate degradation	34583.1	16291.2	7683.09	17083.2	12560.6	21569.5	9793.79	11013.2	24368.9	13674	21334.7	19039.6	20423.5	17498.8	13903.7	21545.8	18760.1	24739.7	15239.6	20297.9	12083	21721.7	26073.8	21800.9	18504.5	15609.8	8761.47	23429	9633.42	33839.1	0.874663	-0.1932	0.993118	-0.01
M00077	Chondroitin sulfate degradation	34583.1	16291.2	7683.09	17083.2	12560.6	21569.5	9793.79	11013.2	24368.9	13674	21334.7	19039.6	20423.5	17498.8	13903.7	21545.8	18760.1	24739.7	15239.6	20297.9	12083	21721.7	26073.8	21798.9	18504.5	15609.8	8761.47	23429	9633.42	33839.1	0.874663	-0.1932	0.993108	-0.01
M00133	Polyamine biosynthesis, arginine => agmatine => putrescine => spermidine	30865.6	18909.1	8725.75	11727.5	18900.6	21951.8	7124.39	25732.5	17175.8	21573.3	12992.6	27517.8	10045.3	8789.56	14372.9	13383.1	14834.8	28451.4	7414.37	13956.9	13562.7	24191.1	20471.8	10204.4	8540.61	17628.8	15672	11769.6	28329.7	22987.4	1.20379	0.267589	1.14233	0.192
M00027	GABA (gamma-Aminobutyrate) shunt	18518.5	14123.7	9351.32	20959	10097.8	22090	10249.9	26390.7	20158.3	30274.2	9281.29	16502.5	13022.3	19498	21535.7	10005.6	18098.5	18724.4	9067.69	10098.6	16428.8	21131.1	18994.9	18885.9	20505.2	12671.8	16337.6	15744.3	11755.2	21192.3	1.24945	0.321296	1.19071	0.252
M00580	Pentose phosphate pathway, archaea, fructose 6P => ribose 5P	2739.55	4693.31	22599.6	23263.5	16340.6	20764.9	20783.8	17875.4	13187.6	20986.5	14926.2	7555.77	14923.2	26021.1	17579.1	11928.5	16625.6	6395.7	10618.1	7887.05	13533.7	17022.7	12779	21765.4	19711.1	11593.3	30019.5	16754.7	7597.05	9398.24	1.214	0.279767	1.19124	0.252
M00697	Multidrug resistance, efflux pump MdtEF-TolC	34233.5	25059.8	6597.5	13022.2	8974.84	15183.9	7235.2	11807	18631.7	12501.1	15869.4	17906.7	15557.3	12298	11304.7	17194.2	14417.3	27839.3	11197.9	15441.7	8316.69	20094.6	18037	14920	10866.2	10564.6	8909.03	16072.7	8760.24	26766.2	0.963656	-0.0534101	0.901154	-0.15
M00696	Multidrug resistance, efflux pump AcrEF-TolC	34231.2	25059.2	6597.5	13022.2	8974.51	15182.9	7235.2	11807	18630	12501.6	15869.4	17906.7	15559.6	12296	11303.4	17194.2	14417.3	27837.3	11196.3	15441.4	8316.36	20093.6	18037	14919.3	10862.9	10564.6	8909.03	16071.1	8759.91	26762.6	0.963652	-0.0534161	0.901114	-0.15
M00575	Pertussis pathogenicity signature, T1SS	34227.2	25057.8	6599.5	13023.2	8973.85	15180.9	7236.2	11807	18626.7	12499.6	15870.4	17906.7	15555.3	12292	11305.7	17194.2	14417.3	27839	11192.9	15440.7	8316.7	20096.6	18037	14918	10861.6	10564.6	8909.03	16067.7	8759.25	26755.2	0.963638	-0.0534372	0.901088	-0.15
M00880	Molybdenum cofactor biosynthesis, GTP => molybdenum cofactor	18400.4	12534.3	10681	8482.1	30290	17305.6	7501.85	30275.1	14466.6	14923.1	10052.6	20214.6	7521.7	6443.58	14838.9	10797.6	14894.8	25120.7	5206.71	9384.87	14356.2	27762.1	17970.5	6823.5	6511.83	16669.3	10929.4	9706.6	28574.1	19352.1	1.32443	0.405374	1.27459	0.35
M00860	Bacillus anthracis pathogenicity signature, polyglutamic acid capsule biosynthesis	17474	16710.7	10427.9	9228.44	20766.5	16480.4	8667.57	17070.8	14711.5	14367.1	13550.6	18876.3	9548.91	8665.9	17778.7	11706.7	11860	17728.6	6531.89	14820.4	11551.7	16473.8	13586	8528.77	7445.96	12815.3	9743.72	13405.4	23869.3	16672.1	1.1132	0.154711	1.02307	0.033
M00131	Inositol phosphate metabolism, Ins(1,3,4,5)P4 => Ins(1,3,4)P3 => myo-inositol	19287.2	16003.1	6863.74	10388.2	16440.5	14113	8925.24	21565.7	16252.4	20716.2	12048.5	14455.2	12554.8	13835	10150.5	11611.5	14182.1	16759.6	11685.9	12535.2	10174.7	17190.6	14983.6	9854.8	10729.4	10933.4	8541.69	12360.8	13527	20708.1	1.15974	0.2138	0.99373	-0.009
M00878	Phenylacetate degradation, phenylaxetate => acetyl-CoA/succinyl-CoA	14475.4	28267.2	13555.2	6758.72	26755.6	13204.5	7577.42	29212.4	14587.1	7542.61	11387	21686.5	4709.18	4625.8	19038.8	8176.2	8679.17	20786.1	2988.67	13969.2	13688.3	14647	11719.3	4607.37	4050.31	12033.5	13755.2	8719.23	32215.5	10478.3	1.39544	0.480719	1.08503	0.118
M00651	Vancomycin resistance, D-Ala-D-Lac type	6724.47	20102.1	16093	6033.59	17575.8	14720.7	9478.6	24688.2	14077.2	17188.5	12337.8	21335.4	5751.37	6772.87	19853.2	8166.53	9860.33	16601.9	2799.83	15596.4	9251.5	16655.8	9202.77	2906.18	6125.8	14636	11069.8	10625	38131.6	13072.8	1.23184	0.300816	1.10583	0.145
M00045	Histidine degradation, histidine => N-formiminoglutamate => glutamate	29630.7	32901.2	6200.77	5927.25	11703.8	12213	3926.49	20609.1	10011.6	11977.8	7719.6	14895.9	7525.84	3649.47	6048.12	9892.16	10717.1	30378.5	4136.87	6699.99	7092.34	36067.9	15640.7	4254.07	4312.95	10530.6	12206.3	5117.94	13202.9	22916.3	1.42727	0.513261	1.29193	0.37
M00078	Heparan sulfate degradation	23553.1	10836.7	5052.59	11431.9	8521.25	14624.3	6559.66	7142.17	16450.7	9507.24	14416.3	12861.1	13690.3	11634.4	9353.27	14426.2	12887.7	16084.9	10163.8	13601.7	8007.07	15136.7	17289.3	14646.2	13737.8	10583.8	7839.88	15844.4	6704.92	23804.7	0.88042	-0.183736	1.03466	0.049
M00652	Vancomycin resistance, D-Ala-D-Ser type	4705.75	18499.3	22243.5	6758.79	12616.4	9504.68	12275.3	15068.8	11589.8	8019.41	15690.1	18078	6953.99	6740.34	20907.4	10845.8	9198.4	16047.3	3173.99	17935	6670	11626	6721.5	3218.61	5679.5	13083.8	8980.81	13370.3	29347.1	4931.59	0.965846	-0.0501349	0.825267	-0.277
M00569	Catechol meta-cleavage, catechol => acetyl-CoA / 4-methylcatechol => propanoyl-CoA	3357.07	2402.73	6161.22	13465.8	14240.2	22849.6	6321.41	20527.5	11072.3	13174.5	2873.08	5996.73	4791.33	12025.6	12530.9	2089.01	13020.9	6432.33	3138.72	2633.48	17845.8	11762.3	19722.9	11675.2	13019.1	11311.2	13358.5	7468.9	11466.6	9929.77	1.73308	0.793338	1.94653	0.961
M00134	Polyamine biosynthesis, arginine => ornithine => putrescine	2342.61	2249.17	5992.31	16643.4	6996.95	16639.2	7284.54	12151.8	10182.6	18256.3	1336.48	6444.83	5617.55	15039.7	13100.2	2188.17	11794.4	5348.66	3332.17	2036.49	11098.1	9574.43	11374.7	29509.5	12860	3764.53	33274.5	7398.04	4951.38	7244.88	1.49065	0.575946	1.97845	0.984
M00030	Lysine biosynthesis, AAA pathway, 2-oxoglutarate => 2-aminoadipate => lysine	17195.8	13536.4	4223.17	7398.04	9633.79	12252.8	4390.38	12836.5	11635.9	11540.6	8391.97	12585	7420.59	6384.74	7874.3	8281.71	8709.1	12188.9	5440.73	9139.62	7391.63	12070.5	12031.2	7863.09	7112.38	9222.66	6815.62	8920.74	12209.7	15658	1.21092	0.276101	1.14903	0.2
M00365	C10-C20 isoprenoid biosynthesis, archaea	1607.33	1700.47	6000.9	14929.6	6161.91	14391.3	8200.45	14726	11193.9	13032.3	2776.17	5171.87	7075.34	15735.1	12228.6	2091.58	12618.6	5292.03	7489.25	4058.95	11513.5	6405.14	9639.38	11385.9	13046.2	4585.11	15623.7	6754.95	5636.38	6038.14	1.23353	0.302791	1.21588	0.282
M00643	Multidrug resistance, efflux pump MexXY-OprM	15374.8	13330.5	4488.17	7303.11	4904.12	7528.75	4888.71	5276.83	9736.43	13220.5	8994.96	9687.97	8001.77	6634.78	7232.46	9350.55	7892.96	9804.08	5832.92	8752.93	4893.79	12132.8	10668	9006.09	11365	5857.99	5286.82	9659.38	5948.34	13855	1.04705	0.0663269	1.07894	0.11
M00642	Multidrug resistance, efflux pump MexJK-OprM	15388.5	13279.8	4486.17	7263.11	4840.78	7527.41	4882.71	5266.83	9718.43	13213.1	8553.64	9687.31	7975.09	6606.78	7209.46	9324.21	7895.64	9804.08	5816.26	8701.25	4890.79	12049.5	10666.7	8871.08	8201.04	5858.98	5274.16	9600.04	5776	13822.5	1.05263	0.0739975	1.04213	0.06
M00064	ADP-L-glycero-D-manno-heptose biosynthesis	6457.6	7426.69	6895.99	4330.18	17743.8	9584.89	4766.53	12828.5	7720.18	21758.5	4466.04	17634.1	2737.21	2192.15	15929	4333.03	10453.4	7943.93	2077.38	9202.19	10918.5	6566.95	9101.37	3407.65	2631.28	7249.27	2936.47	5396.06	18977.8	5490.72	1.2929	0.370616	0.944233	-0.083
M00176	Assimilatory sulfate reduction, sulfate => H2S	17646.3	24515	4525.67	3850.32	9354.29	3600.62	2888.84	14467.3	6715.06	21428.7	4665.83	13366.9	3539.24	1054.33	8030.88	4413.44	4751.86	17981.3	1600.38	4240.2	3295.16	23412.8	1644.54	2750.46	7567.05	3285.12	6161.05	1784.68	6325.16	11582.3	1.71252	0.776118	1.06543	0.091
M00367	C10-C20 isoprenoid biosynthesis, non-plant eukaryotes	1197.41	1345.8	5105.49	12826.6	5027.83	13728.5	5234.04	14064.3	9780.1	11885.4	839.59	4551.87	4277.34	11463.2	11587.4	1124.83	9605.82	5143.53	2767.59	1546.61	11348.2	4877.48	8356.38	10496.1	12130.8	3863.19	11454.7	6413.37	4733.63	5390.89	1.51576	0.600041	1.49439	0.58
M00118	Glutathione biosynthesis, glutamate => glutathione	2364.41	2662.17	2604.87	3649.78	2194.9	3299.65	5223.61	24325.5	12984.6	33108	3168.19	6285.37	4739.34	9827.82	3404.31	1889.07	5760.29	4515.92	5909.12	4598.04	1553.91	3839.21	2911.37	1436.44	3050.74	3323.73	3822.08	3209.28	12979.4	13115.6	1.84475	0.883428	0.982919	-0.025
M00550	Ascorbate degradation, ascorbate => D-xylulose-5P	4690.67	1595.24	2373.31	3738.38	19374.9	16613.3	3302.69	12534.8	4984.85	3796.18	3016.58	5957.19	1890.02	2632.27	4438.22	2516.84	5245.58	4637.73	1681.56	3083.94	6244.89	22928.9	2403.25	4770.7	2249.56	3743.06	16785.2	3459.84	8349.37	9015.68	2.0799	1.05651	2.2778	1.188
M00530	Dissimilatory nitrate reduction, nitrate => ammonia	7510.45	5138.45	3535.24	3726.06	2708.29	2534.15	3165.94	11572	6117.68	5308.57	4159.86	3667.06	3805.35	3134.31	4216.17	4516.32	3939.93	2797.55	1853.21	3491.84	2915.99	24246.9	9141.38	4649.45	4647.66	6588.65	6467.08	4753.19	5177.35	13711.8	1.44223	0.5283	2.31298	1.21
M00546	Purine degradation, xanthine => urea	1208.08	4737.76	2094.91	382.25	37349.3	7427.59	1554.25	23810	7106.84	634.8	2106.41	7669.92	159.26	128.34	8190.92	235.25	4036.84	2121.76	152.01	2974.33	12883.3	4063.33	1666.17	1073.32	379.58	3750.97	720.84	4215.51	8490.24	4294.7	3.10732	1.63567	1.49552	0.581
M00013	Malonate semialdehyde pathway, propanoyl-CoA => acetyl-CoA	2237.08	4420.34	6698.49	2330.88	20458	6928.69	4498.6	14217.9	4261.43	3195.54	5942.56	5530.4	2291.59	2245.75	5664.27	3735.26	2144.86	3345.07	1055.01	4266.77	7627.43	3713.57	3517.1	1356.09	1887.83	5966.67	3420.77	4710.01	11790	3254.28	1.91176	0.934903	1.3043	0.383
M00529	Denitrification, nitrate => nitrogen	4214.7	3684.61	2851.11	2956.59	1973.8	1709.85	2669.6	8641.32	3773.28	4498.41	3294.1	2392.9	2904.11	2965.15	3586.88	4010.42	3260.83	1392.06	1619.2	2822.89	2434.99	14980.6	7766.7	3851.52	4064.33	5496.97	2902.56	4397.02	3986.89	8971.21	1.30886	0.388306	2.08339	1.059
M00700	Multidrug resistance, efflux pump AbcA	940.84	837.58	2455.9	9762.81	4518.17	7601.24	4314.58	2859.01	1433.24	1249.08	572.91	2832.92	3640.42	9857.84	4834.17	1261.91	4788.95	1268.08	1530.41	528.16	780.75	7796.88	7694	10725.1	4518.4	3555.71	11387.4	3898.17	868.55	3080	1.15608	0.209246	1.74525	0.803
M00046	Pyrimidine degradation, uracil => beta-alanine, thymine => 3-aminoisobutanoate	2076.74	3588.09	1740.87	1336.25	13941	5105.93	1280.09	13699.3	3299.59	1487.07	1919.91	4530.34	1106.77	1322.84	4703.58	1272.25	2714.84	2303.75	575.68	2134.33	6151.16	5868.75	5192.25	1372.68	1754.33	5533.5	2498.67	3222.02	6394.32	3851.26	2.10567	1.07428	1.85257	0.89
M00156	Cytochrome c oxidase, cbb3-type	7381	2250.5	3993.5	2368.5	1156.5	1188	2773	2523.5	1993.5	23847.5	1836.5	7956	2148.5	1384	5842	2737	3751	8607	1735.5	1968	1401	1413.5	517	963	476	161	452.5	492.5	2192	1117.5	1.30317	0.382025	0.241957	-2.047
M00531	Assimilatory nitrate reduction, nitrate => ammonia	615.25	1312.83	5471.04	1623.66	8838.34	4705.67	3988.42	4647.42	1576.92	2398.35	4621.58	1345.42	2142.25	2068.75	2011.64	3148.25	1726.33	715.95	917.33	1705.76	3058.25	1286.5	3147.75	328.82	1676.5	4170.66	1864.41	3125.67	6849.42	1624.42	1.72413	0.78587	1.32981	0.411
M00155	Cytochrome c oxidase, prokaryotes	10227.5	1857	1763	1704	981	1262.02	663.5	1618	1398	2288	2663	5679	3249	1842	2024.5	3896	3819.5	15517	2271	1810	233	5458.99	574	638	563	531	672	449	141	2020	0.555564	-0.847975	0.26373	-1.923
M00726	Cationic antimicrobial peptide (CAMP) resistance, lysyl-phosphatidylglycerol (L-PG) synthase MprF	658.25	560.75	334.46	649.65	440.5	989.75	861.2	8602.5	4009.25	11191.5	545.31	2078.95	823.5	2118.65	1076.25	345.75	1127.65	1538.95	487	818.35	583.75	8810.06	794.2	844.8	714.6	2110.2	712.21	1023.45	3991.8	7215.7	2.58183	1.3684	2.44525	1.29
M00567	Methanogenesis, CO2 => methane	4760.5	1704.68	647.68	1603.64	1531.82	1406.68	364.11	1953.32	2172.11	3158.83	1318.07	5160.42	481.07	137.39	2573.1	1186.36	1521.89	5177.32	323.86	2919.43	1284.29	3617.03	2174.04	848.18	243.07	729.64	1669.15	674.89	7375.43	1638.25	0.928095	-0.107655	0.9738	-0.038
M00761	Undecaprenylphosphate alpha-L-Ara4N biosynthesis, UDP-GlcA => undecaprenyl phosphate alpha-L-Ara4N	326.82	2789.18	1079	599.5	2935.32	1739	134.5	1666	2006.18	82.58	624	7714.5	80.68	78	8091.32	441.5	3286.5	3579.5	80.68	4613.14	1728.32	654.5	391.5	132.18	98.32	1617.5	1013	1531.18	9926.82	433.18	0.467232	-1.09779	0.613033	-0.706
M00040	Tyrosine biosynthesis, prephanate => pretyrosine => tyrosine	976.08	1601.17	5719.83	1870.5	1793.83	947	4055.25	763.25	1025.67	3244.97	4579.25	268.5	2600.92	2377.25	1147.58	3930.25	1308	352.75	1171.17	1604.41	394.08	2660.25	915.67	878.5	2263.58	2141.33	2073.75	3458.17	536.83	1249.09	1.13741	0.185749	0.856835	-0.223
M00545	Trans-cinnamate degradation, trans-cinnamate => acetyl-CoA	1532.16	142.43	118.33	270.09	6924.67	6820.01	423.84	4785.5	734.96	125.3	1278.49	1152.16	61.33	169.45	439.33	196.84	2228.78	1106.43	97.47	619.2	4474.84	610.99	7958.68	287.63	249	4973.96	1111.3	231	4958.67	1224.61	2.97671	1.57372	3.54864	1.827
M00356	Methanogenesis, methanol => methane	4497	1669.01	609.76	1441.48	1345.99	1457.51	359.52	1890.99	1895.77	2772.31	1165.49	4648.19	450.49	125.48	2263.2	1132.02	1385.98	4782.24	290.02	2440.01	1108.53	3566.71	1963.28	694.01	207.24	627.48	1506.05	601.98	6698.26	1585.5	0.96019	-0.0586086	0.993359	-0.01
M00804	Complete nitrification, comammox, ammonia => nitrite => nitrate	1666.98	1374.18	897.3	1355.5	583.32	398.9	961.84	4280.5	714.08	2004.26	1250.96	670.16	1506.18	1535.66	1683.48	1769.84	1360.66	591.16	757.68	1095.38	901.66	8545.66	3032.68	1806.68	2082.22	3048.66	1349.48	2185.68	1624.82	4113.58	1.16494	0.22025	2.34766	1.231
M00563	Methanogenesis, methylamine/dimethylamine/trimethylamine => methane	4494	1622.01	594.76	1454.48	1343.99	1242.51	343.52	1823.49	1867.77	2772.31	1165.49	4567.19	450.49	134.48	2231.2	1131.02	1387.48	4777.24	308.02	2436.01	1108.53	3563.71	1972.28	694.01	207.24	620.48	1506.05	601.98	6694.26	1587.5	0.944602	-0.0822221	0.998247	-0.003
M00087	beta-Oxidation	5356.65	3637.85	1528.13	641.57	489.98	591.24	212	3523.66	1402.91	1056.19	1479.8	2833.5	789.85	111.5	1439.32	1827.66	1503.04	8009.5	206.02	1731.03	168.65	7397.91	242	994.92	62.05	951	588.63	438.18	1523.95	3102.96	0.925191	-0.112177	0.776182	-0.366
M00098	Acylglycerol degradation	438.75	288.25	233.74	138.65	7565	4084.35	358.75	4403	1447.6	125.75	565.45	1537.75	51.25	89.5	1005.39	101.75	1736.7	632.39	47.5	630.43	3019.5	6337.1	2653	435.92	53.35	3279.52	930.2	669.5	5959.05	4106.88	2.98273	1.57663	4.28939	2.101
M00338	Cysteine biosynthesis, homocysteine + serine => cysteine	2485.42	555.17	1114.74	1880.75	1249.91	844.25	2578.41	457.83	1028.41	1447.87	2036.08	1821.5	3582	4627.34	828.34	1594.91	4285.67	4086	5196.83	2699.67	338.75	615.83	291	316.08	797.41	550.58	1950.41	496.41	360.75	114.25	0.443547	-1.17284	0.18959	-2.399
M00081	Pectin degradation	3945.4	12533.8	816.17	204.03	736.17	943.27	316.17	2961.17	1954.29	1525.1	484.2	1603.17	319.77	40.29	283.53	658.6	1158.89	3934.62	121.14	370.13	576	2899.17	514	146.33	806.4	454.17	3503.42	500.57	901	4708.6	2.88997	1.53105	1.67251	0.742
M00704	Tetracycline resistance, efflux pump Tet38	729.17	858.42	1001.46	1798.33	652.58	104.9	2739.16	235.67	409.65	1743.58	1803.13	98.25	3073.25	4369.34	483.92	1448.5	2943.83	212.75	4711.66	2435.24	95.25	5371.33	996	990.42	1289.06	970.42	2438.38	902.58	354.5	2145.9	0.476042	-1.07084	0.720757	-0.472
M00075	N-glycan biosynthesis, complex type	255.5	2441.5	978.5	445.5	1732	986	52	1359.5	1354	26	425	4213	38	37.5	7016.5	239.5	1735	3077.5	25	4108	1037.5	415	341.5	88	6	1327	101	1134.5	7733.5	240	0.460459	-1.11886	0.594023	-0.751
M00044	Tyrosine degradation, tyrosine => homogentisate	7139	879	1086	810	562	759	147	411	723	1480.77	1556	3982	1075	45	1230.5	2514	2086	11455	253	630	7	17	0.017	6.99	7	0.99	20	0.017	12	13.51	0.563783	-0.826787	0.00340459	-8.198
M00175	Nitrogen fixation, nitrogen => ammonia	318.5	2766.26	786.43	390.94	4015.68	956.68	186.68	5619.18	1351.07	123.17	711.5	2746.93	32.68	219.82	1391.57	300	199.82	871.89	62.12	1553.06	1702.5	1604.93	191.25	776.5	187.75	1202.18	1588.64	822.18	2649.25	439	2.04151	1.02964	1.3801	0.465
M00358	Coenzyme M biosynthesis	5381.87	806	838.79	826	476.12	670.46	246.12	341.5	655.5	1195	1393.25	3007.25	1425.63	612.62	1112.39	2004.25	1912.62	8409.64	823.25	802.88	96.62	257.25	167	119.5	159.5	93.5	191.88	177.12	852.75	163.25	0.531877	-0.910836	0.105952	-3.239
M00151	Cytochrome bc1 complex respiratory unit	1303.5	1052	1144	769	400	238.01	1105.5	1543	719	11160	300	2668	150	154	2145.5	444	840.5	437	157	517	162	2392.99	146	511	111	186	253	130	1020	1128	2.48739	1.31464	0.773069	-0.371
M00309	Non-phosphorylative Entner-Doudoroff pathway, gluconate/galactonate => glycerate	1358.33	1372	840	807	311	109	815.67	264	614	1772.34	1084.33	163.33	1036	727.33	433.33	1680.67	1182.33	428.33	589	890	270.67	3207.33	1904.34	1319	1316	658.33	926.34	1568	476	1863	1.00593	0.00852592	1.6445	0.718
M00152	Cytochrome bc1 complex	1222	842	1087	740	350	230	1074.5	1264.5	663	11155	277	2638	130	138	2105	415	829.5	426	154	493	141	308	102	373	103	3	129	112	991	507	2.44928	1.29236	0.364079	-1.458
M00596	Dissimilatory sulfate reduction, sulfate => H2S	826.56	312.41	648.09	669.15	932.34	259.26	586.78	402.84	482	5690.29	745.56	1570.9	85.59	97.81	1468.22	235.94	704.51	342.22	156	1283.84	1071.19	2836.25	1287.88	1182.6	282.25	769.85	529.04	145.34	1871.55	1349.35	1.61566	0.692124	1.69272	0.759
M00702	Multidrug resistance, efflux pump NorB	673	677	416.4	389	121	47.2	404	160	302.2	884.77	513.4	106	530	364	193	839	585	219	301	386.2	93	9985	866	1110	642.2	1375	977.4	786	181	4591.2	1.00941	0.0135072	5.10499	2.352
M00538	Toluene degradation, toluene => benzoate	34	57	118	264.25	104.75	317.5	319	1068.5	667	855.77	103.5	174.75	289.75	734.5	417	78.75	427.75	353.75	172.5	117.75	191.5	787	233.25	9008	337	253.75	9896.5	369.5	222.75	152.5	1.32605	0.407138	7.47448	2.902
M00537	Xylene degradation, xylene => methylbenzoate	34	57	118	264.25	104.75	317.5	318.5	1068.5	667	855.77	103.5	174.75	289.75	734.5	417	78.75	427.75	353.75	172.5	117.75	191.5	787	233.25	9008	337	253.75	9896.5	369.5	222.75	152.5	1.32588	0.406948	7.47448	2.902
M00903	Fosfomycin biosynthesis, phosphoenolpyruvate => fosfomycin	504.5	168.5	500	349	3644.5	597	606.5	2267.5	615.5	5525	233.5	1672	62	45	1747	159	392.5	202.5	58	290	1171	166	40	189.5	73	189	54.17	310.5	815.5	303.33	3.0398	1.60398	0.681271	-0.554
M00540	Benzoate degradation, cyclohexanecarboxylic acid =>pimeloyl-CoA	61	128	68	18	6985	976	242	4002	716	104.57	286	940	14	6	1462.5	1	15	16	4	170	2214	76	17	44	64	377	28	528	650	597	4.56359	2.19017	1.5766	0.657
M00097	beta-Carotene biosynthesis, GGAP => beta-carotene	2645.17	1089.33	564	339.5	298.67	369.67	79	820.5	435.67	533	815.66	1429	374.84	67	438.5	943.67	777.66	3880.67	99.83	314.34	39	401.33	459.84	118.83	1605	30.83	39.83	55.67	809.17	513.5	0.784857	-0.349499	0.445567	-1.166
M00154	Cytochrome c oxidase	2524.75	713.75	455.15	290.15	222	257.12	76.25	630	344.2	501.25	576.15	1414.75	369.75	46.5	424.75	891.25	707.7	3837.75	88.5	248.7	17.5	2657.43	34	183.6	13.45	327.2	195.4	15.5	20.55	1368.55	0.698903	-0.516836	0.561619	-0.832
M00416	Cytochrome aa3-600 menaquinol oxidase	25	7	18.6	8.6	48	11.14	5	78	22.8	9	12.6	67	19	2	13	5	16.8	17	10	22.8	50	10428.4	12	642.4	5.8	1244.8	645.6	10	54.2	4140.2	1.25886	0.332112	93.0529	6.54
M00047	Creatine pathway	589	267	269	426	727	985.5	601	891	2151.5	376.5	672.5	1054	110	244.5	444.5	377.5	512.5	234	166	445.5	230.5	472.5	1936.5	257.5	221	469	299	288.5	940	958	1.70934	0.77344	1.42513	0.511
M00867	KDO2-lipid A modification pathway	786.33	685.17	413	455	213.33	58	407.5	259.5	388.67	958.77	516.5	669	527.67	365.5	390.83	884	601	295	297.17	586.33	69.33	2061.5	873	619	651.83	308.33	705	797.67	374.83	991.34	0.901085	-0.150265	1.45175	0.538
M00615	Nitrate assimilation	743.66	752.84	484	481	148.16	77	474.5	486.5	590.84	946.85	527	115	543.84	400.5	344.66	865	695.5	240	303.84	410.99	96.16	1642	932.5	621.17	667.66	326.83	538.5	811.84	278.66	948.76	1.16621	0.221826	1.54376	0.626
M00564	Helicobacter pylori pathogenicity signature, cagA pathogenicity island	716.33	678	434	452	217	57	426.67	131	313	912.91	604.33	82.33	528	370.33	256.33	886.67	620.33	205.33	314	540	210.67	1637.33	1047.34	733	722	373.33	492.34	823	329	971	0.984178	-0.0230095	1.66506	0.736
M00372	Abscisic acid biosynthesis, beta-carotene => abscisic acid	2503	293	372	282	193	263	50.5	211	266	520	532	1353	359	21	412	875	716	3844	88	248	22	329	21	11	6	10	10	11	13	136	0.586352	-0.770162	0.0673532	-3.892
M00856	Salmonella enterica pathogenicity signature, typhoid toxin	499	107	479	360	157	115	517.5	271.5	260	5572	96.5	1230.5	60.5	45	1049	167	408	197.5	75.5	221.33	66	126.5	34.5	173	44	0.017	41	47.5	494	5	2.34818	1.23155	0.2905	-1.783
M00616	Sulfate-sulfur assimilation	196.97	1122.39	350.68	294.32	791.33	653.68	136.68	1005.18	1077.51	88.85	248	985.18	43.03	132.16	326.97	156	963.96	521.8	61.91	373.42	433.65	190.08	65	126.06	83.33	547.79	442.48	372.03	746.85	121.19	1.49972	0.584696	0.820595	-0.285
M00730	Cationic antimicrobial peptide (CAMP) resistance, VraFG transporter	15.5	5.5	1.3	9.5	34	6.9	0.5	54	16.4	4.5	7.3	39.5	13.5	2	2.5	3.5	8	9.5	5	13.4	32	5863	2	349	3.9	667	352.8	6	29.5	2221.9	1.42131	0.507216	91.4309	6.515
M00555	Betaine biosynthesis, choline => betaine	27.5	14	7.8	23	31	4.9	19.5	47.5	25.9	7.54	38.3	35.5	85	40	18	9	39.5	14	54	39.06	36	5211.66	12	310.66	23.4	630.66	328.8	15.5	50.5	2082.74	0.560318	-0.835682	23.3696	4.547
M00038	Tryptophan metabolism, tryptophan => kynurenine => 2-aminomuconate	209.5	283	103.4	47	125	122.37	30	388.5	114.2	64	64.4	213.5	22	38	116.5	86	51.5	158	13	70.2	87	2152	38	137	10.2	204	166.9	59.5	947	654.95	1.78486	0.835814	5.34936	2.419
M00633	Semi-phosphorylative Entner-Doudoroff pathway, gluconate/galactonate => glycerate-3P	86	215.13	171.19	210	232.17	207.07	40.37	825.17	278.4	72.33	85	392.37	15.17	103.4	440.47	51	139.2	183.67	24	198.67	329	96.77	144.87	21.2	31	218.17	82.53	128.37	266	128	1.43166	0.517689	0.885459	-0.176
M00422	Acetyl-CoA pathway, CO2 => acetyl-CoA	41	57.5	38	38.5	118	42.5	30.5	38.5	188	65	155	55.5	40.5	19	213	95	31	97.5	46	23	23.5	394	52.5	40	133	75	1814.5	404	495	76.5	0.84784	-0.238136	4.52353	2.177
M00145	NAD(P)H:quinone oxidoreductase, chloroplasts and cyanobacteria	23.25	35.75	25.75	18.75	13	19.25	1.75	36.5	65	2.25	36.75	16.75	4.75	17.5	1.25	1.25	29.5	63.75	3.5	5.5	13.5	2585.5	1	205	35.25	319	175	2.5	12.75	1042.75	1.33657	0.41853	24.3338	4.605
M00417	Cytochrome o ubiquinol oxidase	18.25	1.75	0.65	5.75	16	2.45	0.25	19.5	5.7	5.33	3.15	16.75	8.75	0.5	6.25	1.25	4	9.25	6.5	7.02	20.5	2604.5	1	156.32	6.45	311.32	159.4	2.5	12.75	1047.38	1.19253	0.254021	68.1507	6.091
M00714	Multidrug resistance, efflux pump QacA	6.75	1.75	1.25	7.75	17	2.25	7.25	21	6.5	3.59	6.75	16.75	8.75	1.5	12.75	2.25	7	5.25	3.5	7.83	12.5	2585.83	9	154	2.25	312	164	5.5	21.75	1035	1.03816	0.0540266	59.475	5.894
M00625	Methicillin resistance	12	4	0.017	0.017	40	8	0.017	56	16	0.017	0.017	24	12	0.017	0.017	4	0.017	0.017	0.017	8	28	2656	0.017	152	4	188	128	4	16	608	2.82874	1.50016	78.6665	6.298
M00072	N-glycosylation by oligosaccharyltransferase	53.33	195	559	47.5	133.5	48	163.67	30	83.5	185.84	90.83	136.83	2	5.83	356.33	11.17	42.83	6.33	10	155.5	636.67	18.83	156.34	118	33	82.83	47.84	14	263.5	67.5	1.83372	0.874772	1.75932	0.815
M00090	Phosphatidylcholine (PC) biosynthesis, choline => PC	140.87	21	5.5	14	23.12	68.12	22.62	20	16.5	20.5	35.25	43.75	13.63	3.12	29.25	23.25	19.62	115	6.25	15.38	63.12	823.25	24	51.33	33.83	44	332.05	20.12	48.75	318.58	1.15675	0.210076	5.77678	2.53
M00143	NADH dehydrogenase (ubiquinone) Fe-S protein/flavoprotein complex, mitochondria	15	194	556	7.5	26.5	35	160	26	66.5	178.5	0.5	113.5	0.017	0.5	305	1.5	22.5	3	0.017	5.5	502	3.5	0.017	1	0.017	17.5	1.5	4	77.5	24.5	2.79846	1.48463	1.39709	0.482
M00542	EHEC/EPEC pathogenicity signature, T3SS and effectors	68.3	267.7	189	9	3.3	82	54	108	133.7	73	0.017	234	12.7	29	95.3	0.017	216	192	16.7	6.6	75.3	20	225	6.7	43.3	9	0.017	16.7	48.3	36.7	1.23141	0.300308	0.599522	-0.738
M00698	Multidrug resistance, efflux pump BpeEF-OprC	0.67	25.33	1	20	31.67	0.67	5.5	5	9	4.77	220.66	0.33	13.34	14	13	14.67	1.66	0.017	8.33	27.34	2	41.66	0.67	69	1582	0.017	6.33	29.67	87.67	21.33	0.330656	-1.5966	5.87319	2.554
M00660	Xanthomonas spp. pathogenicity signature, T3SS and effectors	61.31	265.69	189	9	2.31	79	54	108	128.69	70	0.017	234	9.69	23	90.31	0.017	216	185	11.69	4.95	74.31	16	225	4.69	32.31	9	0.017	11.69	47.31	25.69	1.24827	0.319927	0.575748	-0.796
M00136	GABA biosynthesis, prokaryotes, putrescine => GABA	80.32	209.68	43	4	7.32	4	9	235	51.68	10.85	21	12	6.68	21	5.82	23	5	16	6.68	15.32	2.32	15	11	11.68	16.32	0.017	8	10.68	4.32	180.43	4.94226	2.30517	1.96051	0.971
M00128	Ubiquinone biosynthesis, eukaryotes, 4-hydroxybenzoate => ubiquinone	77	208	43	3	13	0.017	10.5	240	47	3	28	59	2	16	1	27	4	9	2	17	4	17	11	9.33	3	1.33	15	5	1	164.42	3.90616	1.96575	1.40048	0.486
M00595	Thiosulfate oxidation by SOX complex, thiosulfate => sulfate	69	203	42	3	6	0.017	12	235	39	3	11	12	2	13	0.017	23	5	8	1	12	5	11	11	9	0.017	0.017	23	4	0.017	163	7.0333	2.8142	2.59778	1.377
M00161	Photosystem II	9	20	14.5	9	0.017	10	0.017	10	34.5	0.017	12	0.017	0.017	10	0.017	0.017	14.5	25.5	0.017	0.017	0.017	0.017	0.017	30	20	10	10	0.017	0.017	4.5	1.72379	0.785587	1.20101	0.264
M00905	Grixazone biosynthesis, aspartate 4-semialdehyde => grixazone B	1.5	0.43	0.017	10.43	8	17	0.017	77	5.29	0.017	14.5	7	0.017	15.79	1.5	15.5	1.79	1.79	1.14	0.86	0.5	2	0.017	0.017	0.017	0.017	4.29	4	2	0.5	1.99878	0.99912	0.223053	-2.165
M00162	Cytochrome b6f complex	7	14	10.5	7	0.017	7	0.017	7	24.5	0.017	12	0.017	0.017	7	0.017	0.017	10.5	22.5	0.017	0.017	0.017	0.017	0.017	21	14	7	7	0.017	0.017	3.5	1.47885	0.564475	1.00927	0.013
M00879	Arginine succinyltransferase pathway, arginine => glutamate	13.65	3.35	0.017	0.017	5.65	5	1.5	0.017	8.35	12.7	0.017	0.017	14.35	10	7.65	3	2	8	12.35	4.65	5.65	3	0.017	3.35	14.65	0.017	0.017	8.35	2.65	23.6	0.810056	-0.303907	0.988184	-0.017
M00163	Photosystem I	6	12	9	6	0.017	6	0.017	6	21	0.017	6	0.017	0.017	6	0.017	0.017	9	15	0.017	0.017	0.017	0.017	0.017	18	12	6	6	0.017	0.017	3	1.82957	0.871502	1.24882	0.321
M00622	Nicotinate degradation, nicotinate => fumarate	1	13	3	3	0.017	2	1	2.5	8	0.017	0.017	8	1	0.017	9	0.017	3.5	37	0.017	6	5	0.017	1	0.017	0.017	4	0.017	0.017	13	2	0.519359	-0.945195	0.388505	-1.364
M00568	Catechol ortho-cleavage, catechol => 3-oxoadipate	21	2	0.017	5	0.017	0.017	3	2.5	1	4.08	0.017	0.017	4	0.017	1.5	0.017	8.5	2	0.017	0.017	2	4	0.017	1.32	1	1.32	1	7	16	9.43	2.39914	1.26252	2.67588	1.42
M00378	F420 biosynthesis	4	8	0.017	19	0.017	0.017	7	0.017	4	4	4	0.017	0.017	0.017	0.5	0.017	0.017	4	0.017	2	0.017	0.017	4	0.017	4	0.017	4	4	8	4	4.34522	2.11943	2.64743	1.405
M00113	Jasmonic acid biosynthesis	0.017	0.017	1	6	5	0.017	7	1	1	0.017	4	0.017	3	1	11.5	0.017	3	1	1	2	0.017	0.33	8	0.017	1	10	6	3	7	0.017	0.794	-0.332789	1.33342	0.415
M00861	beta-Oxidation, peroxisome, VLCFA	0.017	0.017	1	6	5	0.017	7	1	1	0.017	4	0.017	3	1	11.5	0.017	3	1	1	2	0.017	0.33	8	0.017	1	10	6	3	7	0.017	0.794	-0.332789	1.33342	0.415
M00745	Imipenem resistance, repression of porin OprD	24	0.017	0.017	0.017	0.017	0.017	0.017	0.017	0.017	5.19	0.017	2	1	0.017	2	0.017	18	2	0.017	0.017	0.017	2	0.017	2.66	2	0.66	0.017	0.017	9	2.84	1.16907	0.225355	0.766514	-0.384
M00744	Cationic antimicrobial peptide (CAMP) resistance, protease PgtE	8.66	1.34	0.017	0.017	0.66	2	0.017	0.017	3.34	3.74	0.017	0.017	3.34	4	0.66	0.017	4	2	3.34	1.32	0.66	0.017	0.017	1.34	4.66	0.017	0.017	3.34	2.66	7.34	1.05863	0.0821966	1.07252	0.101
M00551	Benzoate degradation, benzoate => catechol / methylbenzoate => methylcatechol	20	0.017	0.017	0.017	0.017	0.017	1.5	0.017	0.017	3.08	0.017	0.017	4	0.017	0.017	0.017	8	0.017	0.017	0.017	0.017	0.017	0.017	1.32	0.017	1.32	0.017	0.017	4	5.68	2.03518	1.02516	1.02357	0.034
M00746	Multidrug resistance, repression of porin OmpF	4.66	1.34	0.017	0.017	0.66	2	0.017	0.017	3.34	3.54	0.017	0.017	4.34	4	0.66	0.017	0.017	2	3.34	0.99	0.66	0.017	0.017	1.34	4.66	0.017	0.017	3.34	0.66	7.34	1.01364	0.0195427	1.1734	0.231
M00091	Phosphatidylcholine (PC) biosynthesis, PE => PC	0.017	4	1	1	1	0.017	5	2.5	6	0.017	10	0.017	0.017	0.017	0.017	0.017	0.5	0.017	0.017	2	1	0.017	0.017	0.017	3	0.017	0.017	0.017	0.017	2	1.62858	0.703611	0.484904	-1.044
M00533	Homoprotocatechuate degradation, homoprotocatechuate => 2-oxohept-3-enedioate	3	0.017	0.017	0.017	0.017	0.017	0.017	2	0.017	3.85	0.017	1	1	1	1.5	0.017	1	2	0.017	0.017	1	4	0.017	0.33	1	0.33	0.017	3	1	1.42	1.18512	0.245035	1.60069	0.679
M00112	Tocopherol/tocotorienol biosynthesis	1	2	1.5	1	0.017	1	0.017	1	3.5	0.017	2	0.017	0.017	1	0.017	0.017	1.5	3.5	0.017	0.017	0.017	0.017	0.017	3	2	1	1	0.017	0.017	0.5	1.36398	0.447827	0.936189	-0.095
M00789	Rebeccamycin biosynthesis, tryptophan => rebeccamycin	0.017	0.017	0.017	0.017	5	0.017	0.5	0.5	0.017	0.017	0.017	0.017	0.017	0.017	2	2	0.5	0.017	5	2	5	0.017	0.017	0.017	0.017	0.017	0.017	0.017	0.017	0.017	0.528183	-0.92089	0.444799	-1.169
M00790	Pyrrolnitrin biosynthesis, tryptophan => pyrrolnitrin	0.017	0.017	0.017	0.017	5	0.017	0.5	0.5	0.017	0.017	0.017	0.017	0.017	0.017	2	2	0.5	0.017	5	2	5	0.017	0.017	0.017	0.017	0.017	0.017	0.017	0.017	0.017	0.528183	-0.92089	0.444799	-1.169
M00641	Multidrug resistance, efflux pump MexEF-OprN	8	0.017	0.017	0.017	0.017	0.017	0.017	0.017	0.017	0.017	0.017	0.017	1	0.017	0.017	0.017	8	0.017	0.017	0.017	0.017	0.017	0.017	0.017	0.017	0.017	0.017	0.017	4	0.017	0.892404	-0.164232	0.454575	-1.137
M00104	Bile acid biosynthesis, cholesterol => cholate/chenodeoxycholate	2	0.017	0.017	0.017	1	0.017	1	0.017	0.017	0.017	0.017	0.017	1	0.017	2	2	2	0.017	1	2	2	0.017	1	0.017	0.017	0.017	0.017	0.017	3	0.017	0.409118	-1.28941	0.607767	-0.718
M00146	NADH dehydrogenase (ubiquinone) 1 alpha subcomplex	0.017	2	0.017	3	0.017	0.017	3	0.017	0.017	0.017	0.017	1	0.017	1	0.017	0.017	0.017	1	2	0.017	1	0.017	1	0.017	0.017	0.017	0.017	0.017	0.017	0.017	1.59134	0.670239	0.418659	-1.256
M00787	Bacilysin biosynthesis, prephenate => bacilysin	0.017	0.017	0.017	0.017	0.017	0.017	0.017	0.017	0.67	0.017	0.017	0.17	0.017	0.017	0.017	0.017	0.017	0.17	0.017	0.5	0.5	2.17	0.17	4.83	0.017	1.33	1	0.017	0.017	0.17	0.858186	-0.220638	10.658	3.414
M00769	Multidrug resistance, efflux pump MexPQ-OpmE	5	0.017	0.017	0.017	0.017	0.017	0.017	0.017	0.017	0.017	0.017	0.017	0.017	0.017	0.017	0.017	2	0.017	0.017	0.017	0.017	0.017	0.017	0.33	0.017	0.33	0.017	0.017	1	1.42	2.3934	1.25906	1.47794	0.564
M00835	Pyocyanine biosynthesis, chorismate => pyocyanine	0.017	0.017	0.017	1	0.017	0.017	1	0.017	0.017	0.017	0.017	0.017	0.017	1	0.017	0.017	0.017	0.017	0.017	0.017	2	0.017	0.017	0.017	0.017	0.017	0.017	0.017	1	2	1.85256	0.889519	4.43972	2.15
M00649	Multidrug resistance, efflux pump AdeABC	0.017	0.017	0.017	0.017	0.017	0.017	0.017	0.017	0.017	1.71	0.017	0.017	0.017	0.017	0.017	0.017	0.017	0.017	0.017	0.017	0.017	0.017	0.017	0.33	0.017	0.33	0.017	0.017	0.017	4.42	10.9588	3.45402	30.5824	4.935
M00066	Lactosylceramide biosynthesis	0.017	0.017	0.017	0.017	1	0.017	1	0.017	0.017	0.017	0.017	0.017	0.017	0.017	0.017	0.017	0.017	0.017	1	0.017	2.5	0.017	0.017	0.017	0.5	0.017	0.017	0.017	0.5	0.017	1.85256	0.889519	3.13877	1.65
M00099	Sphingosine biosynthesis	0.017	0.017	0.017	0.017	0.017	0.017	1	0.017	0.017	0.017	0.017	0.017	0.017	0.017	0.017	0.017	0.017	0.017	0.017	0.017	0.017	3.33	0.017	0.017	0.017	0.017	0.017	0.017	2	0.017	6.78235	2.76179	32.1529	5.007
M00548	Benzene degradation, benzene => catechol	0.017	0.017	0.017	0.017	0.017	0.017	0.017	0.017	0.017	0.017	0.017	0.017	6	0.017	0.017	0.017	0.017	0.017	0.017	0.017	0.017	0.017	0.017	0.017	0.017	0.017	0.017	0.017	0.017	0.017	0.0276288	-5.17768	0.0276288	-5.178
M00037	Melatonin biosynthesis, tryptophan => serotonin => melatonin	0.017	0.017	0.017	0.017	0.017	0.017	0.017	0.5	0.017	0.017	0.017	0.017	0.017	0.017	0.017	0.017	0.5	0.017	0.017	0.017	0.017	0.017	0.017	0.017	0.017	0.017	0.017	0.017	2	2	1	0	6.33384	2.663
M00042	Catecholamine biosynthesis, tyrosine => dopamine => noradrenaline => adrenaline	0.017	0.017	0.017	0.017	0.017	0.017	0.017	0.5	0.017	0.017	0.017	0.017	0.017	0.017	0.017	0.017	0.5	0.017	0.017	0.017	0.017	0.017	0.017	0.017	0.017	0.017	0.017	0.017	2	2	1	0	6.33384	2.663
M00779	Dihydrokalafungin biosynthesis, octaketide => dihydrokalafungin	0.017	0.017	0.017	0.017	0.017	0.017	0.017	0.017	0.017	0.017	0.017	0.017	0.017	0.017	0.5	0.017	0.017	0.017	0.017	0.017	0.017	0.017	0.017	0.017	0.017	0.017	0.017	0.017	4	0.017	0.260337	-1.94155	6.35988	2.669
M00608	2-Oxocarboxylic acid chain extension, 2-oxoglutarate => 2-oxoadipate => 2-oxopimelate => 2-oxosuberate	0.017	0.017	0.017	0.017	0.017	0.017	0.017	0.017	0.017	0.017	0.017	0.017	0.017	0.017	0.017	0.017	0.017	0.017	0.017	0.017	4	0.017	0.017	0.017	0.017	0.017	0.017	0.017	0.017	0.017	1	0	24.4294	4.611
M00736	Nocardicin A biosynthesis, L-pHPG + arginine + serine => nocardicin A	0.017	0.017	0.017	0.017	0.017	0.017	0.017	0.017	0.017	0.017	0.017	0.017	0.017	0.017	0.017	0.017	0.017	0.017	0.017	0.017	0.017	0.017	0.017	0.017	0.017	0.017	0.017	0.017	4	0.017	1	0	24.4294	4.611
M00773	Tylosin biosynthesis, methylmalonyl-CoA + malonyl-CoA => tylactone => tylosin	0.017	0.017	0.017	0.017	0.017	0.017	0.017	0.017	0.017	0.017	0.017	0.017	0.017	0.017	0.017	0.017	0.017	0.017	0.017	0.017	0.017	0.017	0.017	0.017	0.017	0.017	0.017	0.017	4	0.017	1	0	24.4294	4.611
M00798	dTDP-L-mycarose biosynthesis	0.017	0.017	0.017	0.017	0.017	0.017	0.017	0.017	0.017	0.017	0.017	0.017	0.017	0.017	0.017	0.017	0.017	0.017	0.017	0.017	0.017	0.017	0.017	0.017	0.017	0.017	2	0.017	2	0.017	1	0	24.3294	4.605
M00799	dTDP-L-oleandrose biosynthesis	0.017	0.017	0.017	0.017	0.017	0.017	0.017	0.017	0.017	0.017	0.017	0.017	0.017	0.017	0.017	0.017	0.017	0.017	0.017	0.017	0.017	0.017	0.017	0.017	0.017	0.017	2	0.017	2	0.017	1	0	24.3294	4.605
M00800	dTDP-L-megosamine biosynthesis	0.017	0.017	0.017	0.017	0.017	0.017	0.017	0.017	0.017	0.017	0.017	0.017	0.017	0.017	0.017	0.017	0.017	0.017	0.017	0.017	0.017	0.017	0.017	0.017	0.017	0.017	2	0.017	2	0.017	1	0	24.3294	4.605
M00801	dTDP-L-olivose biosynthesis	0.017	0.017	0.017	0.017	0.017	0.017	0.017	0.017	0.017	0.017	0.017	0.017	0.017	0.017	0.017	0.017	0.017	0.017	0.017	0.017	0.017	0.017	0.017	0.017	0.017	0.017	2	0.017	2	0.017	1	0	24.3294	4.605
M00802	dTDP-D-forosamine biosynthesis	0.017	0.017	0.017	0.017	0.017	0.017	0.017	0.017	0.017	0.017	0.017	0.017	0.017	0.017	0.017	0.017	0.017	0.017	0.017	0.017	0.017	0.017	0.017	0.017	0.017	0.017	2	0.017	2	0.017	1	0	24.3294	4.605
M00803	dTDP-D-angolosamine biosynthesis	0.017	0.017	0.017	0.017	0.017	0.017	0.017	0.017	0.017	0.017	0.017	0.017	0.017	0.017	0.017	0.017	0.017	0.017	0.017	0.017	0.017	0.017	0.017	0.017	0.017	0.017	2	0.017	2	0.017	1	0	24.3294	4.605
M00850	Vibrio cholerae pathogenicity signature, cholera toxins	0.017	0.017	0.017	0.017	0.017	0.017	0.017	0.017	0.017	0.017	0.017	0.017	0.017	0.017	1	0.017	0.017	1	0.017	0.017	0.017	1	0.017	0.017	1	0.017	0.017	0.017	0.017	0.017	0.079588	-3.6513	1	0
M00851	Carbapenem resistance	3	0.017	0.017	0.017	0.017	0.017	0.017	0.017	0.017	0.017	0.017	0.017	0.017	0.017	0.017	0.017	0.017	0.017	0.017	0.017	0.017	0.017	0.017	0.017	0.017	0.017	0.017	0.017	0.017	0.75	18.5471	4.21312	5.31176	2.409
M00637	Anthranilate degradation, anthranilate => catechol	0.017	0.017	0.017	0.017	0.017	0.017	0.017	0.017	0.017	0.017	0.017	0.017	0.017	0.017	0.017	0.017	0.017	0.017	0.017	0.017	0.017	0.017	0.017	0.017	0.017	0.017	0.017	0.017	0.017	2.25	1	0	14.1353	3.821
M00039	Monolignol biosynthesis, phenylalanine/tyrosine => monolignol	0.017	0.017	0.017	0.017	0.017	0.017	0.017	0.017	0.017	0.017	0.017	0.017	0.017	0.017	0.017	0.017	0.017	0.017	0.017	0.017	0.017	0.017	0.017	0.017	0.017	0.017	0.017	0.017	2	0.017	1	0	12.6647	3.663
M00073	N-glycan precursor trimming	0.017	0.017	0.017	0.017	0.017	0.017	0.017	0.017	0.017	0.017	0.017	0.017	0.017	0.017	0.017	0.017	0.017	0.017	0.017	0.017	0.017	0.017	0.017	0.017	0.017	0.017	0.017	0.017	2	0.017	1	0	12.6647	3.663
M00074	N-glycan biosynthesis, high-mannose type	0.017	0.017	0.017	0.017	0.017	0.017	0.017	0.017	0.017	0.017	0.017	0.017	0.017	0.017	0.017	0.017	0.017	0.017	0.017	0.017	0.017	0.017	0.017	0.017	0.017	0.017	0.017	0.017	2	0.017	1	0	12.6647	3.663
M00778	Type II polyketide backbone biosynthesis, acyl-CoA + malonyl-CoA => polyketide	0.017	0.017	0.017	0.017	0.017	0.017	0.017	0.017	0.017	0.017	0.017	0.017	0.017	0.017	0.017	0.017	0.017	0.017	0.017	0.017	0.017	0.017	0.017	0.017	0.017	0.017	0.017	0.017	2	0.017	1	0	12.6647	3.663
M00784	Elloramycin biosynthesis, 8-demethyltetracenomycin C => elloramycin A	0.017	0.017	0.017	0.017	0.017	0.017	0.017	0.017	0.017	0.017	0.017	0.017	0.017	0.017	0.017	0.017	0.017	0.017	0.017	0.017	0.017	0.017	0.017	0.017	0.017	0.017	0.017	0.017	2	0.017	1	0	12.6647	3.663
M00797	dTDP-D-desosamine biosynthesis	0.017	0.017	0.017	0.017	0.017	0.017	0.017	0.017	0.017	0.017	0.017	0.017	0.017	0.017	0.017	0.017	0.017	0.017	0.017	0.017	0.017	0.017	0.017	0.017	0.017	0.017	0.017	0.017	2	0.017	1	0	12.6647	3.663
M00819	Pentalenolactone biosynthesis, farnesyl-PP => pentalenolactone	0.017	0.017	0.017	0.017	0.017	0.017	0.017	0.017	0.017	0.017	0.017	0.017	0.017	0.017	0.017	0.017	0.017	0.017	0.017	0.017	0.017	0.017	0.017	0.017	0.017	0.017	0.017	0.017	2	0.017	1	0	12.6647	3.663
M00829	3,6-Dimethylsalicylyl-CoA biosynthesis, malonyl-CoA => 6-methylsalicylate => 3,6-dimethylsalicylyl-CoA	0.017	0.017	0.017	0.017	0.017	0.017	0.017	0.017	0.017	0.017	0.017	0.017	0.017	0.017	0.017	0.017	0.017	0.017	0.017	0.017	0.017	0.017	0.017	0.017	0.017	0.017	0.017	0.017	2	0.017	1	0	12.6647	3.663
M00433	Lysine biosynthesis, 2-oxoglutarate => 2-oxoadipate	0.017	0.017	0.017	0.017	0.017	0.017	0.017	0.017	0.017	0.017	0.017	0.017	0.017	0.017	0.017	0.017	0.017	0.017	0.017	0.017	2	0.017	0.017	0.017	0.017	0.017	0.017	0.017	0.017	0.017	1	0	12.6647	3.663
M00638	Salicylate degradation, salicylate => gentisate	0.017	0.017	0.017	0.017	0.017	0.017	1	0.017	0.017	0.017	0.017	0.017	0.017	0.017	0.017	0.017	0.017	0.017	0.017	0.017	1	0.017	0.017	0.017	0.017	0.017	0.017	0.017	0.017	0.017	6.78235	2.76179	6.78235	2.762
M00673	Cephamycin C biosynthesis, aminoadipate + cycteine + valine => cephamycin C	0.017	0.017	0.017	0.017	0.017	0.017	0.5	0.017	0.017	0.017	0.017	0.017	0.017	0.017	0.017	0.017	0.017	0.017	0.017	0.017	0.017	0.017	0.017	1	0.017	0.017	0.017	0.017	0.017	0.017	3.84118	1.94155	6.78235	2.762
M00705	Multidrug resistance, efflux pump MepA	0.017	0.5	0.017	0.5	0.017	0.017	0.017	0.017	0.017	0.017	0.017	0.017	0.017	0.017	0.017	0.017	0.017	0.017	0.017	0.017	0.017	0.017	0.017	0.017	0.5	0.017	0.017	0.017	0.017	0.017	6.68235	2.74036	3.84118	1.942
M00534	Naphthalene degradation, naphthalene => salicylate	0.017	0.017	0.017	0.017	0.017	0.017	0.017	0.017	0.017	0.017	0.017	0.017	0.017	0.017	0.017	0.017	0.017	0.017	0.017	0.017	1	0.017	0.017	0.017	0.017	0.017	0.017	0.017	0.017	0.017	1	0	6.78235	2.762
M00101	Cholesterol biosynthesis, squalene 2,3-epoxide => cholesterol	0.017	0.017	0.017	0.017	0.017	0.017	1	0.017	0.017	0.017	0.017	0.017	0.017	0.017	0.017	0.017	0.017	0.017	0.017	0.017	0.017	0.017	0.017	0.017	0.017	0.017	0.017	0.017	0.017	0.017	6.78235	2.76179	1	0
